# Supplementary material for: Guanidinylated Polymyxins as Outer Membrane Permeabilizers Capable of Potentiating Rifampicin, Erythromycin, Ceftazidime and Aztreonam against Gram-Negative Bacteria
Source: MDPI journal article supplement (doi:10.3390/antibiotics11101277), 2022-09-20
Supplement: s1 [file s1]

## Supplementary Material

### Contents

|                                                                                                                                                                              |    |
|------------------------------------------------------------------------------------------------------------------------------------------------------------------------------|----|
| Synergistic studies of guanidinylated polymyxins with different antibiotics against wild-type Gram-negative bacteria .....                                                   | 2  |
| Synergistic studies of guanidinylated polymyxins with rifampicin, erythromycin, ceftazidime and aztreonam against multidrug-resistant Gram-negative bacteria .....           | 7  |
| Triple combination studies of guanidinylated polymyxins and PMBN with ceftazidime or aztreonam and avibactam against $\beta$ -lactamase harboring <i>P. aeruginosa</i> ..... | 15 |
| Time-kill curves .....                                                                                                                                                       | 17 |
| Outer membrane permeabilization .....                                                                                                                                        | 18 |
| Structure of guanidinylated polymyxins .....                                                                                                                                 | 19 |
| NMR spectra of guanidinylated polymyxins .....                                                                                                                               | 20 |
| MALDI-MS spectra .....                                                                                                                                                       | 26 |
| HPLC chromatograms.....                                                                                                                                                      | 27 |
| Resistance phenotype of MDR/XDR clinical isolates.....                                                                                                                       | 28 |

# Synergistic studies of guanidylated polymyxins with different antibiotics against wild-type Gram-negative bacteria

**Table S1. Potentiation of GCol in combination with different antibiotics against wild-type *P. aeruginosa* PAO1**

| Antibiotic      | MIC antibiotic (µg/mL) |             | MIC GCol (µg/mL) |             | FIC index     | Absolute MIC (µg/mL) at 4 µg/mL GCol | Fold-potentiation |
|-----------------|------------------------|-------------|------------------|-------------|---------------|--------------------------------------|-------------------|
|                 | Alone                  | Combination | Alone            | Combination |               |                                      |                   |
| Rifampicin      | 16                     | 0.125       | >128             | 2           | 0.008<x<0.023 | 0.0625                               | 256               |
| Novobiocin      | 1024                   | 4           | >128             | 8           | 0.004<x<0.066 | 128                                  | 8                 |
| Vancomycin      | 256                    | 8           | >128             | 4           | 0.031<x<0.063 | 8                                    | 32                |
| Erythromycin    | 256                    | 16          | >128             | 2           | 0.063<x<0.078 | 16                                   | 16                |
| Clindamycin     | 1024                   | 8           | >128             | 4           | 0.008<x<0.039 | 8                                    | 128               |
| Linezolid       | 1024                   | 128         | >128             | 4           | 0.125<x<0.156 | 128                                  | 8                 |
| Tobramycin      | 2                      | 2           | >128             | 0.25        | 1<x<1.002     | 2                                    | 1                 |
| Colistin        | 0.5                    | 0.5         | >128             | 0.25        | 1<x<1.002     | 0.5                                  | 1                 |
| Ceftazidime     | 2                      | 0.125       | >128             | 8           | 0.063<x<0.125 | 0.25                                 | 8                 |
| Aztreonam       | 4                      | 0.5         | >128             | 4           | 0.125<x<0.156 | 0.5                                  | 8                 |
| Piperacillin    | 4                      | 0.5         | >128             | 8           | 0.125<x<0.188 | 1                                    | 4                 |
| Ciprofloxacin   | 0.125                  | 0.031       | >128             | 4           | 0.25<x<0.281  | 0.03125                              | 4                 |
| Levofloxacin    | 0.5                    | 0.063       | >128             | 4           | 0.125<x<0.156 | 0.0625                               | 8                 |
| Moxifloxacin    | 1                      | 0.063       | >128             | 4           | 0.063<x<0.094 | 0.0625                               | 16                |
| Minocycline     | 16                     | 0.5         | >128             | 4           | 0.031<x<0.063 | 0.5                                  | 32                |
| Doxycycline     | 8                      | 1           | >128             | 2           | 0.125<x<0.141 | 1                                    | 8                 |
| Chloramphenicol | 32                     | 4           | >128             | 4           | 0.125<x<0.156 | 4                                    | 8                 |
| Pleuromutilin   | 1024                   | 245         | >128             | 4           | 0.25<x<0.281  | 256                                  | 4                 |

**Table S2. Potentiation of GPMB in combination with different antibiotics against wild-type *P. aeruginosa* PAO1**

| Antibiotic   | MIC antibiotic (µg/mL) |             | MIC GPMB (µg/mL) |             | FIC index     | Absolute MIC (µg/mL) at 4 µg/mL GPMB | Fold-potentiation |
|--------------|------------------------|-------------|------------------|-------------|---------------|--------------------------------------|-------------------|
|              | Alone                  | Combination | Alone            | Combination |               |                                      |                   |
| Rifampicin   | 16                     | 0.5         | >16              | 1           | 0.031<x<0.094 | 0.03125                              | 512               |
| Novobiocin   | 1024                   | 2           | >16              | 4           | 0.002<x<0.252 | 4                                    | 256               |
| Vancomycin   | 256                    | 8           | >16              | 2           | 0.031<x<0.156 | 2                                    | 128               |
| Erythromycin | 256                    | 4           | 16               | 2           | 0.141         | 2                                    | 128               |

|                 |       |       |     |      |               |         |     |
|-----------------|-------|-------|-----|------|---------------|---------|-----|
| Clindamycin     | 2048  | 8     | 16  | 4    | 0.254         | 8       | 256 |
| Linezolid       | 1024  | 32    | >16 | 4    | 0.031<x<0.281 | 32      | 32  |
| Tobramycin      | 2     | 2     | 16  | 0.25 | 1.016         | 2       | 1   |
| Colistin        | 1     | 1     | >16 | 0.25 | 1<x<1.016     | 1       | 1   |
| Ceftazidime     | 2     | 0.125 | 16  | 4    | 0.313         | 0.125   | 16  |
| Aztreonam       | 2     | 0.25  | 16  | 4    | 0.375         | 0.25    | 8   |
| Piperacillin    | 4     | 1     | >16 | 4    | 0.25<x<0.5    | 1       | 4   |
| Ciprofloxacin   | 0.125 | 0.031 | >16 | 4    | 0.25<x<0.5    | 0.0625  | 2   |
| Levofloxacin    | 0.25  | 0.031 | 16  | 4    | 0.375         | 0.03125 | 8   |
| Moxifloxacin    | 1     | 0.063 | 16  | 4    | 0.312         | 0.0625  | 16  |
| Minocycline     | 16    | 0.5   | >16 | 2    | 0.031<x<0.156 | 0.5     | 32  |
| Doxycycline     | 8     | 0.5   | >16 | 2    | 0.063<x<0.188 | 0.5     | 16  |
| Chloramphenicol | 32    | 2     | >16 | 2    | 0.063<x<0.188 | 2       | 16  |
| Pleuromutilin   | 1024  | 128   | >16 | 2    | 0.125<x<0.25  | 32      | 32  |

**Table S3. Potentiation of GCol in combination with different antibiotics against wild-type *A. baumannii* ATCC 17978**

| Antibiotic    | MIC antibiotic (µg/mL) |             | MIC GCol (µg/mL) |             | FIC index     | Absolute MIC (µg/mL) at 2 µg/mL GCol | Fold-potentiation |
|---------------|------------------------|-------------|------------------|-------------|---------------|--------------------------------------|-------------------|
|               | Alone                  | Combination | Alone            | Combination |               |                                      |                   |
| Rifampicin    | 2                      | 0.063       | >128             | 0.5         | 0.031<x<0.035 | 0.0625                               | 32                |
| Novobiocin    | 8                      | 0.5         | >128             | 8           | 0.031<x<0.094 | 0.5                                  | 16                |
| Vancomycin    | 128                    | 64          | >128             | 0.5         | 0.5<x<0.504   | 64                                   | 2                 |
| Erythromycin  | 32                     | 32          | >128             | 0.25        | 1<x<1.002     | 32                                   | 1                 |
| Clindamycin   | 1024                   | 256         | >128             | 8           | 0.25<x<0.313  | 512                                  | 2                 |
| Linezolid     | 256                    | 128         | >128             | 0.25        | 0.5<x<0.502   | 128                                  | 2                 |
| Tobramycin    | 1                      | 1           | >128             | 0.25        | 1<x<1.002     | 1                                    | 1                 |
| Colistin      | 0.25                   | 0.25        | >128             | 0.25        | 1<x<1.002     | 0.25                                 | 1                 |
| Ceftazidime   | 16                     | 4           | >128             | 2           | 0.25<x<0.266  | 4                                    | 4                 |
| Aztreonam     | 64                     | 8           | >128             | 16          | 0.125<x<0.25  | 64                                   | 1                 |
| Piperacillin  | 64                     | 16          | >128             | 8           | 0.25<x<0.313  | 64                                   | 1                 |
| Ciprofloxacin | 1                      | 1           | >128             | 0.25        | 1<x<1.002     | 1                                    | 1                 |
| Levofloxacin  | 0.125                  | 0.125       | >128             | 0.25        | 1<x<1.002     | 0.125                                | 1                 |
| Moxifloxacin  | 0.063                  | 0.063       | >128             | 0.25        | 1<x<1.002     | 0.063                                | 1                 |

|                 |       |       |      |      |               |       |    |
|-----------------|-------|-------|------|------|---------------|-------|----|
| Minocycline     | 0.125 | 0.125 | >128 | 0.25 | 1<x<1.002     | 0.125 | 1  |
| Doxycycline     | 0.125 | 0.125 | >128 | 0.25 | 1<x<1.002     | 0.125 | 1  |
| Chloramphenicol | 64    | 64    | >128 | 0.25 | 1<x<1.002     | 64    | 1  |
| Pleuromutilin   | 512   | 32    | >128 | 0.5  | 0.063<x<0.066 | 32    | 16 |

**Table S4. Potentiation of GPMB in combination with different antibiotics against wild-type *A. baumannii* ATCC 17978**

| Antibiotic      | MIC antibiotic (µg/mL) |             | MIC GPMB (µg/mL) |             | FIC index | Absolute MIC (µg/mL) at 2 µg/mL GPMB | Fold-potentiation |
|-----------------|------------------------|-------------|------------------|-------------|-----------|--------------------------------------|-------------------|
|                 | Alone                  | Combination | Alone            | Combination |           |                                      |                   |
| Rifampicin      | 2                      | 0.008       | 16               | 1           | 0.066     | 0.004                                | 512               |
| Novobiocin      | 16                     | 0.125       | 16               | 1           | 0.07      | 0.063                                | 256               |
| Vancomycin      | 128                    | 16          | 16               | 1           | 0.188     | 16                                   | 8                 |
| Erythromycin    | 32                     | 0.5         | 16               | 2           | 0.141     | 0.5                                  | 64                |
| Clindamycin     | 1024                   | 256         | 8                | 1           | 0.375     | 64                                   | 16                |
| Linezolid       | 256                    | 64          | 16               | 2           | 0.375     | 64                                   | 4                 |
| Tobramycin      | 2                      | 1           | 8                | 4           | 1         | 2                                    | 1                 |
| Colistin        | 0.25                   | 0.25        | 16               | 16          | 1.016     | 0.25                                 | 1                 |
| Ceftazidime     | 16                     | 4           | 16               | 2           | 0.375     | 4                                    | 4                 |
| Aztreonam       | 32                     | 4           | 16               | 4           | 0.375     | 32                                   | 2                 |
| Piperacillin    | 64                     | 8           | 16               | 4           | 0.375     | 64                                   | 1                 |
| Ciprofloxacin   | 0.5                    | 0.5         | 16               | 0.25        | 1.016     | 0.5                                  | 1                 |
| Levofloxacin    | 0.063                  | 0.031       | 8                | 4           | 1         | 0.063                                | 1                 |
| Moxifloxacin    | 0.063                  | 0.008       | 16               | 8           | 0.625     | 0.063                                | 1                 |
| Minocycline     | 0.25                   | 0.063       | 8                | 2           | 0.5       | 0.063                                | 4                 |
| Doxycycline     | 0.063                  | 0.063       | 16               | 0.25        | 1.016     | 0.063                                | 1                 |
| Chloramphenicol | 64                     | 32          | 16               | 1           | 0.563     | 32                                   | 2                 |
| Pleuromutilin   | 512                    | 2           | 16               | 2           | 0.129     | 2                                    | 256               |

**Table S5. Potentiation of GCol in combination with different antibiotics against wild-type *E. coli* ATCC 25922**

| Antibiotic | MIC antibiotic (µg/mL) |             | MIC GCol (µg/mL) |             | FIC index | Absolute MIC (µg/mL) at 2 µg/mL GCol | Fold-potentiation |
|------------|------------------------|-------------|------------------|-------------|-----------|--------------------------------------|-------------------|
|            | Alone                  | Combination | Alone            | Combination |           |                                      |                   |
| Rifampicin | 2                      | 0.016       | 16               | 0.25        | 0.023     | 0.008                                | 256               |

|                 |       |       |    |      |       |       |      |
|-----------------|-------|-------|----|------|-------|-------|------|
| Novobiocin      | 128   | 0.5   | 16 | 0.25 | 0.02  | 0.125 | 1024 |
| Vancomycin      | 128   | 16    | 16 | 2    | 0.25  | 16    | 8    |
| Erythromycin    | 32    | 0.5   | 8  | 0.5  | 0.078 | 0.25  | 128  |
| Clindamycin     | 64    | 4     | 16 | 1    | 0.125 | 4     | 16   |
| Linezolid       | 128   | 16    | 8  | 1    | 0.25  | 16    | 8    |
| Tobramycin      | 2     | 1     | 16 | 0.25 | 0.516 | 1     | 2    |
| Colistin        | 0.125 | 0.125 | 16 | 0.25 | 1.016 | 0.125 | 1    |
| Ceftazidime     | 0.25  | 0.063 | 16 | 1    | 0.313 | 0.063 | 4    |
| Aztreonam       | 0.25  | 0.031 | 16 | 1    | 0.188 | 0.031 | 8    |
| Piperacillin    | 2     | 0.125 | 8  | 1    | 0.188 | 0.125 | 16   |
| Ciprofloxacin   | 0.008 | 0.008 | 16 | 0.25 | 1.016 | 0.008 | 1    |
| Levofloxacin    | 0.016 | 0.008 | 16 | 0.5  | 0.531 | 0.008 | 2    |
| Moxifloxacin    | 0.016 | 0.004 | 16 | 4    | 0.5   | 0.008 | 2    |
| Minocycline     | 1     | 0.25  | 16 | 0.5  | 0.281 | 0.25  | 4    |
| Doxycycline     | 1     | 0.25  | 16 | 0.5  | 0.281 | 0.25  | 4    |
| Chloramphenicol | 2     | 0.5   | 16 | 2    | 0.375 | 0.5   | 4    |
| Pleuromutilin   | 64    | 0.25  | 16 | 1    | 0.066 | 0.25  | 256  |

**Table S6. Potentiation of GPMB in combination with different antibiotics against wild-type *E. coli* ATCC 25922**

| Antibiotic   | MIC antibiotic (µg/mL) |             | MIC GPMB (µg/mL) |             | FIC index | Absolute MIC (µg/mL) at 2 µg/mL GPMB | Fold-potentiation |
|--------------|------------------------|-------------|------------------|-------------|-----------|--------------------------------------|-------------------|
|              | Alone                  | Combination | Alone            | Combination |           |                                      |                   |
| Rifampicin   | 2                      | 0.016       | 8                | 0.5         | 0.07      | 0.008                                | 256               |
| Novobiocin   | 64                     | 0.25        | 8                | 0.5         | 0.012     | 0.25                                 | 256               |
| Vancomycin   | 128                    | 8           | 8                | 2           | 0.313     | 8                                    | 16                |
| Erythromycin | 32                     | 0.5         | 8                | 1           | 0.133     | 0.125                                | 256               |
| Clindamycin  | 128                    | 8           | 8                | 2           | 0.313     | 8                                    | 16                |
| Linezolid    | 128                    | 16          | 8                | 1           | 0.25      | 8                                    | 16                |
| Tobramycin   | 1                      | 1           | 8                | 0.25        | 1.031     | 1                                    | 1                 |
| Colistin     | 0.25                   | 0.031       | 8                | 1           | 0.25      | 0.0313                               | 8                 |
| Ceftazidime  | 0.25                   | 0.063       | 8                | 2           | 0.5       | 0.063                                | 4                 |
| Aztreonam    | 0.25                   | 0.016       | 8                | 2           | 0.313     | 0.016                                | 16                |
| Piperacillin | 2                      | 0.063       | 8                | 2           | 0.281     | 0.063                                | 32                |

|                 |       |       |   |      |       |       |     |
|-----------------|-------|-------|---|------|-------|-------|-----|
| Ciprofloxacin   | 0.008 | 0.004 | 8 | 1    | 0.625 | 0.004 | 2   |
| Levofloxacin    | 0.063 | 0.031 | 8 | 0.5  | 0.563 | 0.032 | 2   |
| Moxifloxacin    | 0.016 | 0.004 | 8 | 2    | 0.5   | 0.004 | 4   |
| Minocycline     | 1     | 0.125 | 8 | 1    | 0.25  | 0.125 | 8   |
| Doxycycline     | 1     | 0.25  | 8 | 1    | 0.375 | 0.25  | 4   |
| Chloramphenicol | 2     | 0.5   | 8 | 2    | 0.5   | 0.5   | 4   |
| Pleuromutilin   | 64    | 0.25  | 8 | 0.25 | 0.035 | 0.125 | 512 |

**Synergistic studies of guanidinylated polymyxins with rifampicin, erythromycin, ceftazidime and aztreonam against multidrug-resistant Gram-negative bacteria**

**Table S7. Potentiation of rifampicin in combination with guanidinylated polymyxins and PMBN against XDR/MDR *P. aeruginosa* clinical isolates**

| Stock number | MIC rifampicin (µg/mL) |             | Adjuvant | MIC adjuvant (µg/mL) |             | FIC index     | Absolute MIC rifampicin (µg/mL) | Fold-potential | Adjuvant concentration at absolute MIC (µg/mL) |
|--------------|------------------------|-------------|----------|----------------------|-------------|---------------|---------------------------------|----------------|------------------------------------------------|
|              | Alone                  | Combination |          | Alone                | Combination |               |                                 |                |                                                |
| P259-96918   | 16                     | 0.125       | PMBN     | >256                 | 2           | 0.008<x<0.016 | 0.125                           | 128            | 4                                              |
|              | 16                     | 0.031       | GCol     | 32                   | 4           | 0.127         | 0.031                           | 512            | 4                                              |
|              | 16                     | 0.016       | GPMB     | 32                   | 4           | 0.126         | 0.016                           | 1024           | 4                                              |
| P262-101856  | 512                    | 32          | PMBN     | >256                 | 8           | 0.063<x<0.094 | 32                              | 16             | 8                                              |
|              | 512                    | 8           | GCol     | 64                   | 4           | 0.078         | 4                               | 128            | 8                                              |
|              | 512                    | 16          | GPMB     | 32                   | 2           | 0.094         | 2                               | 256            | 8                                              |
| P264-104354  | 16                     | 0.25        | PMBN     | >256                 | 2           | 0.016<x<0.023 | 0.25                            | 64             | 2                                              |
|              | 16                     | 0.5         | GCol     | 32                   | 2           | 0.094         | 0.5                             | 32             | 2                                              |
|              | 16                     | 0.125       | GPMB     | 32                   | 2           | 0.07          | 0.125                           | 128            | 2                                              |
| 114228*      | 16                     | 2           | PMBN     | 256                  | 8           | 0.125<x<0.156 | 2                               | 8              | 8                                              |
|              | 16                     | 0.5         | GCol     | 128                  | 8           | 0.031<x<0.094 | 0.5                             | 32             | 8                                              |
|              | 16                     | 1           | GPMB     | 32                   | 4           | 0.188         | 0.125                           | 128            | 8                                              |
| 101243*      | 2                      | 0.25        | PMBN     | >256                 | 8           | 0.125<x<0.156 | 0.25                            | 8              | 8                                              |
|              | 4                      | 0.063       | GCol     | >128                 | 2           | 0.016<x<0.031 | 0.016                           | 256            | 8                                              |
|              | 4                      | 0.031       | GPMB     | >128                 | 2           | 0.008<x<0.023 | 0.008                           | 512            | 8                                              |

\*Colistin-resistant

**Table S8. Potentiation of rifampicin in combination with guanidinylated polymyxins and PMBN against XDR/MDR *A. baumannii* clinical isolates**

| Stock number | MIC rifampicin (µg/mL) |             | Adjuvant | MIC adjuvant (µg/mL) |             | FIC index     | Absolute MIC rifampicin (µg/mL) | Fold-potential | Adjuvant concentration at absolute MIC (µg/mL) |
|--------------|------------------------|-------------|----------|----------------------|-------------|---------------|---------------------------------|----------------|------------------------------------------------|
|              | Alone                  | Combination |          | Alone                | Combination |               |                                 |                |                                                |
| AB027        | 2                      | 0.031       | PMBN     | >256                 | 1           | 0.016<x<0.020 | 0.031                           | 64             | 8                                              |
|              | 1                      | 0.004       | GCol     | >128                 | 2           | 0.004<x<0.020 | 0.004                           | 256            | 8                                              |
|              | 1                      | 0.004       | GPMB     | >128                 | 1           | 0.004<x<0.012 | 0.001                           | 1024           | 8                                              |
| AB031        | 2                      | 0.063       | PMBN     | >256                 | 2           | 0.031<x<0.039 | 0.25                            | 8              | 0.5                                            |

|        |     |       |      |     |     |               |       |     |     |
|--------|-----|-------|------|-----|-----|---------------|-------|-----|-----|
|        | 1   | 0.008 | GCol | 8   | 0.5 | 0.07          | 0.008 | 128 | 0.5 |
|        | 1   | 0.25  | GPMB | 2   | 0.5 | 0.5           | 0.25  | 4   | 0.5 |
| 110193 | 2   | 0.031 | PMBN | 256 | 4   | 0.016<x<0.031 | 0.063 | 32  | 1   |
|        | 1   | 0.008 | GCol | 64  | 1   | 0.023         | 0.008 | 128 | 1   |
|        | 1   | 0.008 | GPMB | 8   | 0.5 | 0.07          | 0.004 | 256 | 1   |
| 92247* | 1   | 0.031 | PMBN | 256 | 8   | 0.031<x<0.063 | 0.031 | 32  | 8   |
|        | 0.5 | 0.016 | GCol | 128 | 4   | 0.031<x<0.063 | 0.016 | 32  | 8   |
|        | 0.5 | 0.016 | GPMB | 128 | 2   | 0.047         | 0.008 | 64  | 8   |

\*Colistin-resistant

**Table S9. Potentiation of rifampicin in combination with guanidinylated polymyxins and PMBN against XDR/MDR *Enterobacteriaceae* clinical isolates**

| Strain                       | MIC rifampicin (µg/mL) |             | Adjuvant | MIC adjuvant (µg/mL) |             | FIC index     | Absolute MIC rifampicin (µg/mL) | Fold-potentiation | Adjuvant concentration at absolute MIC (µg/mL) |
|------------------------------|------------------------|-------------|----------|----------------------|-------------|---------------|---------------------------------|-------------------|------------------------------------------------|
|                              | Alone                  | Combination |          | Alone                | Combination |               |                                 |                   |                                                |
| <i>E. coli</i> 107115        | 32                     | 0.063       | PMBN     | >256                 | 0.25        | 0.002<x<0.003 | 0.063                           | 512               | 1                                              |
|                              | 32                     | 0.063       | GCol     | 4                    | 0.125       | 0.033         | 0.063                           | 512               | 1                                              |
|                              | 16                     | 0.063       | GPMB     | 4                    | 0.125       | 0.035         | 0.063                           | 256               | 1                                              |
| <i>E. coli</i> 94393*        | 8                      | 1           | PMBN     | >256                 | 2           | 0.008<x<0.133 | 1                               | 8                 | 2                                              |
|                              | 4                      | 0.25        | GCol     | 16                   | 1           | 0.125         | 0.063                           | 64                | 2                                              |
|                              | 8                      | 0.5         | GPMB     | 8                    | 0.5         | 0.125         | 0.031                           | 256               | 2                                              |
| <i>E. coli</i> 94474*        | 8                      | 1           | PMBN     | >256                 | 2           | 0.125<x<0.133 | 1                               | 8                 | 4                                              |
|                              | 8                      | 0.125       | GCol     | 32                   | 2           | 0.078         | 0.016                           | 512               | 4                                              |
|                              | 4                      | 0.25        | GPMB     | 16                   | 1           | 0.125         | 0.016                           | 256               | 4                                              |
| <i>E. cloacae</i> 121187*    | 1                      | 1           | PMBN     | >256                 | 8           | 1<x<1.031     | 1                               | 1                 | 8                                              |
|                              | 1                      | 0.25        | GCol     | >128                 | 2           | 0.25<x<0.266  | 0.25                            | 4                 | 8                                              |
|                              | 2                      | 0.125       | GPMB     | >128                 | 8           | 0.063<x<0.125 | 0.125                           | 16                | 8                                              |
| <i>E. cloacae</i> 118564*    | 8                      | 1           | PMBN     | >256                 | 2           | 0.125<x<0.133 | 1                               | 8                 | 8                                              |
|                              | 8                      | 0.5         | GCol     | >128                 | 2           | 0.063<x<0.078 | 0.125                           | 64                | 8                                              |
|                              | 8                      | 0.125       | GPMB     | >128                 | 1           | 0.016<x<0.023 | 0.063                           | 128               | 8                                              |
| <i>K. pneumoniae</i> 113250* | 16                     | 2           | PMBN     | >256                 | 2           | 0.125<x<0.133 | 2                               | 8                 | 8                                              |
|                              | 32                     | 0.125       | GCol     | >128                 | 4           | 0.004<x<0.035 | 0.063                           | 512               | 8                                              |
|                              | 32                     | 0.125       | GPMB     | >128                 | 4           | 0.004<x<0.035 | 0.063                           | 512               | 8                                              |



|                                 |    |       |      |      |   |               |       |     |   |
|---------------------------------|----|-------|------|------|---|---------------|-------|-----|---|
| <i>K. pneumoniae</i><br>113254* | 8  | 2     | PMBN | >256 | 2 | 0.25<x<0.258  | 2     | 4   | 8 |
|                                 | 16 | 0.125 | GCol | >128 | 2 | 0.008<x<0.023 | 0.063 | 256 | 8 |
|                                 | 16 | 0.25  | GPMB | >128 | 2 | 0.016<x<0.031 | 0.063 | 256 | 8 |

\*Colistin-resistant

**Table S10. Potentiation of erythromycin in combination with guanidinylated polymyxins and PMBN against XDR/MDR *P. aeruginosa* clinical isolates**

| Stock number | MIC erythromycin (µg/mL) |             | Adjuvant | MIC adjuvant (µg/mL) |             | FIC index     | Absolute MIC erythromycin (µg/mL) | Fold-potentiation | Adjuvant concentration at absolute MIC (µg/mL) |
|--------------|--------------------------|-------------|----------|----------------------|-------------|---------------|-----------------------------------|-------------------|------------------------------------------------|
|              | Alone                    | Combination |          | Alone                | Combination |               |                                   |                   |                                                |
| P259-96918   | 256                      | 8           | PMBN     | >256                 | 16          | 0.031<x<0.094 | 32                                | 8                 | 4                                              |
|              | 256                      | 8           | GCol     | 32                   | 8           | 0.281         | 32                                | 8                 | 4                                              |
|              | 256                      | 8           | GPMB     | 32                   | 4           | 0.156         | 8                                 | 32                | 4                                              |
| P262-101856  | 2048                     | 128         | PMBN     | >256                 | 2           | 0.063<x<0.07  | 128                               | 16                | 8                                              |
|              | 2048                     | 128         | GCol     | 64                   | 16          | 0.313         | ND                                | ND                | 8                                              |
|              | 2048                     | 128         | GPMB     | 32                   | 8           | 0.313         | 128                               | 16                | 8                                              |
| P264-104354  | 128                      | 8           | PMBN     | >256                 | 8           | 0.063<x<0.094 | 128                               | 1                 | 2                                              |
|              | 256                      | 8           | GCol     | 32                   | 8           | 0.281         | 256                               | 1                 | 2                                              |
|              | 256                      | 8           | GPMB     | 32                   | 2           | 0.094         | 8                                 | 32                | 2                                              |
| 114228*      | 64                       | 64          | PMBN     | 256                  | 0.125       | 1<x<1.0005    | 64                                | 1                 | 8                                              |
|              | 64                       | 32          | GCol     | 128                  | 16          | 0.5<x<0.625   | 64                                | 1                 | 8                                              |
|              | 64                       | 16          | GPMB     | 32                   | 8           | 0.5           | 16                                | 4                 | 8                                              |
| 101243*      | 1024                     | 1024        | PMBN     | >256                 | 0.25        | 1<x<1.001     | 1024                              | 1                 | 8                                              |
|              | 1024                     | 1024        | GCol     | >128                 | 0.25        | 1<x<1.002     | 1024                              | 1                 | 8                                              |
|              | 1024                     | 512         | GPMB     | >128                 | 1           | 0.5<x<0.508   | 512                               | 2                 | 8                                              |

\*Colistin-resistant

**Table S11. Potentiation of erythromycin in combination with guanidinylated polymyxins and PMBN against XDR/MDR *A. baumannii* clinical isolates**

| Stock number | MIC erythromycin (µg/mL) |             | Adjuvant | MIC adjuvant (µg/mL) |             | FIC index     | Absolute MIC erythromycin (µg/mL) | Fold-potential | Adjuvant concentration at absolute MIC (µg/mL) |
|--------------|--------------------------|-------------|----------|----------------------|-------------|---------------|-----------------------------------|----------------|------------------------------------------------|
|              | Alone                    | Combination |          | Alone                | Combination |               |                                   |                |                                                |
| AB027        | 8                        | 0.5         | PMBN     | 256                  | 2           | 0.063<x<0.07  | 0.5                               | 16             | 8                                              |
|              | 4                        | 0.125       | GCol     | 128                  | 1           | 0.031<x<0.039 | 0.125                             | 32             | 8                                              |
|              | 4                        | 0.125       | GPMB     | 128                  | 0.5         | 0.031<x<0.035 | 0.125                             | 32             | 8                                              |
| AB031        | 16                       | 4           | PMBN     | >256                 | 0.25        | 0.25<x<0.251  | 4                                 | 4              | 0.5                                            |
|              | 16                       | 1           | GCol     | 4                    | 0.5         | 0.188         | 1                                 | 16             | 0.5                                            |
|              | 16                       | 2           | GPMB     | 2                    | 0.25        | 0.25          | 0.5                               | 32             | 0.5                                            |
| 110193       | 2                        | 0.5         | PMBN     | >256                 | 0.125       | 0.25<x<0.2504 | 0.5                               | 4              | 1                                              |
|              | 2                        | 0.125       | GCol     | 64                   | 0.5         | 0.07          | 0.125                             | 16             | 1                                              |
|              | 4                        | 0.25        | GPMB     | 4                    | 0.5         | 0.188         | 0.125                             | 32             | 1                                              |
| 92247*       | 8                        | 8           | PMBN     | 256                  | 0.125       | 1<x<1.0005    | 8                                 | 1              | 8                                              |
|              | 8                        | 0.5         | GCol     | 128                  | 8           | 0.063<x<0.125 | 0.5                               | 16             | 8                                              |
|              | 8                        | 0.5         | GPMB     | 128                  | 4           | 0.0934        | 0.5                               | 16             | 8                                              |

\*Colistin-resistant

**Table S12. Potentiation of erythromycin in combination with guanidinylated polymyxins and PMBN against XDR/MDR *Enterobacteriaceae* clinical isolates**

| Strain                | MIC erythromycin (µg/mL) |             | Adjuvant | MIC adjuvant (µg/mL) |             | FIC index      | Absolute MIC erythromycin (µg/mL) | Fold-potential | Adjuvant concentration at absolute MIC (µg/mL) |
|-----------------------|--------------------------|-------------|----------|----------------------|-------------|----------------|-----------------------------------|----------------|------------------------------------------------|
|                       | Alone                    | Combination |          | Alone                | Combination |                |                                   |                |                                                |
| <i>E. coli</i> 107115 | 2048                     | 16          | PMBN     | <256                 | 4           | 0.008<x<0.023  | 64                                | 32             | 1                                              |
|                       | 2048                     | 16          | GCol     | 8                    | 0.5         | 0.07           | 4                                 | 512            | 1                                              |
|                       | 2048                     | 64          | GPMB     | 8                    | 0.5         | 0.094          | 8                                 | 256            | 1                                              |
| <i>E. coli</i> 94393* | 64                       | 2           | PMBN     | >256                 | 8           | 0.0313<x<0.063 | 8                                 | 8              | 2                                              |
|                       | 64                       | 8           | GCol     | 16                   | 2           | 0.25           | 8                                 | 8              | 2                                              |
|                       | 64                       | 2           | GPMB     | 8                    | 2           | 0.282          | 2                                 | 32             | 2                                              |
| <i>E. coli</i> 94474* | 64                       | 32          | PMBN     | >256                 | 8           | 0.5<x<0.531    | 64                                | 1              | 4                                              |
|                       | 64                       | 8           | GCol     | 32                   | 4           | 0.25           | 8                                 | 8              | 4                                              |
|                       | 64                       | 8           | GPMB     | 16                   | 4           | 0.375          | 8                                 | 8              | 4                                              |

|                                 |      |      |      |      |      |                |      |    |   |
|---------------------------------|------|------|------|------|------|----------------|------|----|---|
| <i>E. cloacae</i><br>121187*    | 1024 | 1024 | PMBN | 256  | 0.25 | 1.001          | 1024 | 1  | 8 |
|                                 | 512  | 512  | GCol | 128  | 0.25 | 1.002          | 512  | 1  | 8 |
|                                 | 512  | 512  | GPMB | 128  | 0.25 | 1.002          | 512  | 1  | 8 |
| <i>E. cloacae</i><br>118564*    | 256  | 64   | PMBN | >256 | 2    | 0.25<x<0.258   | 64   | 4  | 8 |
|                                 | 256  | 64   | GCol | >128 | 0.5  | 0.25<x<0.254   | 64   | 4  | 8 |
|                                 | 256  | 32   | GPMB | >128 | 1    | 0.125<x<0.133  | 32   | 8  | 8 |
| <i>K. pneumoniae</i><br>113250* | 32   | 4    | PMBN | >256 | 4    | 0.125<x<0.141  | 4    | 8  | 8 |
|                                 | 64   | 4    | GCol | >128 | 4    | 0.0625<x<0.094 | 4    | 16 | 8 |
|                                 | 64   | 2    | GPMB | >128 | 2    | 0.031<x<0.047  | 2    | 32 | 8 |
| <i>K. pneumoniae</i><br>113254* | 64   | 16   | PMBN | >256 | 2    | 0.25<x<0.258   | 16   | 4  | 8 |
|                                 | 64   | 4    | GCol | >128 | 4    | 0.063<x<0.094  | 4    | 16 | 8 |
|                                 | 64   | 4    | GPMB | >128 | 2    | 0.063<x<0.078  | 4    | 16 | 8 |

\*Colistin-resistant

**Table S13. Potentiation of ceftazidime in combination with guanidinylated polymyxins and PMBN against XDR/MDR *P. aeruginosa* clinical isolates**

| Stock number | MIC ceftazidime (µg/mL) |             | Adjuvant | MIC adjuvant (µg/mL) |             | FIC index     | Absolute MIC ceftazidime (µg/mL) | Fold-potentiation | Adjuvant concentration at absolute MIC (µg/mL) |
|--------------|-------------------------|-------------|----------|----------------------|-------------|---------------|----------------------------------|-------------------|------------------------------------------------|
|              | Alone                   | Combination |          | Alone                | Combination |               |                                  |                   |                                                |
| P259-96918   | 512                     | 64          | PMBN     | >256                 | 16          | 0.125<x<0.188 | 128                              | 4                 | 4                                              |
|              | 512                     | 128         | GCol     | 32                   | 4           | 0.375         | 128                              | 4                 | 4                                              |
|              | 512                     | 128         | GPMB     | 32                   | 4           | 0.375         | 128                              | 4                 | 4                                              |
| P262-101856  | 8                       | 2           | PMBN     | >256                 | 8           | 0.25<x<0.281  | 2                                | 4                 | 8                                              |
|              | 16                      | 2           | GCol     | 64                   | 4           | 0.188         | 2                                | 8                 | 8                                              |
|              | 8                       | 2           | GPMB     | 32                   | 4           | 0.375         | 1                                | 8                 | 8                                              |
| P264-104354  | 64                      | 8           | PMBN     | >256                 | 16          | 0.125<x<0.188 | 64                               | 1                 | 2                                              |
|              | 64                      | 8           | GCol     | 32                   | 4           | 0.25          | 16                               | 4                 | 2                                              |
|              | 64                      | 8           | GPMB     | 8                    | 2           | 0.375         | 8                                | 8                 | 2                                              |
| 114228*      | 4                       | 0.5         | PMBN     | 256                  | 8           | 0.125<x<0.156 | 0.5                              | 8                 | 8                                              |
|              | 8                       | 0.25        | GCol     | 128                  | 8           | 0.031<x<0.094 | 0.25                             | 32                | 8                                              |
|              | 4                       | 1           | GPMB     | 16                   | 4           | 0.5           | 0.0625                           | 64                | 8                                              |
| 101243*      | 64                      | 8           | PMBN     | >256                 | 4           | 0.125<x<0.141 | 8                                | 8                 | 8                                              |

|  |    |   |      |      |   |               |   |    |   |
|--|----|---|------|------|---|---------------|---|----|---|
|  | 64 | 2 | GCol | >128 | 2 | 0.031<x<0.047 | 2 | 32 | 8 |
|  | 32 | 4 | GPMB | >128 | 1 | 0.125<x<0.133 | 4 | 8  | 8 |

\*Colistin-resistant

**Table S14. Potentiation of ceftazidime in combination with guanidinylated polymyxins and PMBN against XDR/MDR *A. baumannii* clinical isolates**

| Stock number | MIC ceftazidime (µg/mL) |             | Adjuvant | MIC adjuvant (µg/mL) |             | FIC index      | Absolute MIC ceftazidime (µg/mL) | Fold-potentiation | Adjuvant concentration at absolute MIC (µg/mL) |
|--------------|-------------------------|-------------|----------|----------------------|-------------|----------------|----------------------------------|-------------------|------------------------------------------------|
|              | Alone                   | Combination |          | Alone                | Combination |                |                                  |                   |                                                |
| AB027        | 2048                    | 1024        | PMBN     | >256                 | 2           | 0.5<x<0.508    | 1024                             | 2                 | 8                                              |
|              | 2048                    | 128         | GCol     | >128                 | 8           | 0.0625<x<0.125 | 128                              | 16                | 8                                              |
|              | 2048                    | 64          | GPMB     | >128                 | 8           | 0.0313<x<0.094 | 64                               | 32                | 8                                              |
| AB031        | 32                      | 32          | PMBN     | >256                 | 0.125       | 1<x<1.0005     | 32                               | 1                 | 0.5                                            |
|              | 32                      | 16          | GCol     | 8                    | 1           | 0.625          | 32                               | 1                 | 0.5                                            |
|              | 32                      | 4           | GPMB     | 2                    | 1           | 0.625          | 32                               | 1                 | 0.5                                            |
| 110193       | 64                      | 64          | PMBN     | 256                  | 0.125       | 1<x<1.0005     | 64                               | 1                 | 1                                              |
|              | 64                      | 8           | GCol     | 64                   | 4           | 0.188          | ND                               | ND                | 1                                              |
|              | 64                      | 4           | GPMB     | 8                    | 1           | 0.188          | 4                                | 16                | 1                                              |
| 92247*       | 16                      | 16          | PMBN     | 256                  | 0.25        | 1<x<1.001      | 16                               | 1                 | 8                                              |
|              | 32                      | 8           | GCol     | 128                  | 16          | 0.25<x<0.375   | 16                               | 2                 | 8                                              |
|              | 16                      | 8           | GPMB     | 128                  | 16          | 0.625          | 8                                | 2                 | 8                                              |

\*Colistin-resistant

**Table S15. Potentiation of aztreonam in combination with guanidinylated polymyxins and PMBN against XDR/MDR *P. aeruginosa* clinical isolates**

| Stock number | MIC aztreonam (µg/mL) |             | Adjuvant | MIC adjuvant (µg/mL) |             | FIC index     | Absolute MIC aztreonam (µg/mL) | Fold-potentiation | Adjuvant concentration at absolute MIC (µg/mL) |
|--------------|-----------------------|-------------|----------|----------------------|-------------|---------------|--------------------------------|-------------------|------------------------------------------------|
|              | Alone                 | Combination |          | Alone                | Combination |               |                                |                   |                                                |
| P259-96918   | 32                    | 4           | PMBN     | >256                 | 4           | 0.125<x<0.141 | 4                              | 8                 | 4                                              |
|              | 32                    | 4           | GCol     | 32                   | 16          | 0.625         | 16                             | 2                 | 4                                              |
|              | 32                    | 8           | GPMB     | 32                   | 4           | 0.375         | 8                              | 4                 | 4                                              |
|              | 32                    | 4           | PMBN     | >256                 | 4           | 0.125<x<0.141 | 4                              | 8                 | 8                                              |

|             |    |    |      |      |    |              |    |    |   |
|-------------|----|----|------|------|----|--------------|----|----|---|
| P262-101856 | 64 | 8  | GCol | 64   | 8  | 0.25         | 8  | 8  | 8 |
|             | 32 | 8  | GPMB | 32   | 2  | 0.313        | 2  | 16 | 8 |
| P264-104354 | 64 | 16 | PMBN | >256 | 4  | 0.25<x<0.266 | 32 | 2  | 2 |
|             | 64 | 8  | GCol | 32   | 4  | 0.25         | 16 | 4  | 2 |
|             | 32 | 8  | GPMB | 8    | 2  | 0.5          | 8  | 4  | 2 |
| 114228*     | 16 | 8  | PMBN | 256  | 1  | 0.5<x<0.504  | 16 | 1  | 8 |
|             | 16 | 4  | GCol | 128  | 16 | 0.25<x<0.375 | 16 | 1  | 8 |
|             | 8  | 1  | GPMB | 32   | 16 | 0.625        | 4  | 2  | 8 |
| 101243*     | 32 | 8  | PMBN | >256 | 1  | 0.25<x<0.254 | 16 | 2  | 8 |
|             | 16 | 4  | GCol | >128 | 1  | 0.25<x<0.258 | 2  | 8  | 8 |
|             | 16 | 4  | GPMB | >128 | 1  | 0.25<x<0.258 | 2  | 8  | 8 |

\*Colistin-resistant

**Table S16. Potentiation of aztreonam in combination with guanidinylated polymyxins and PMBN against XDR/MDR *A. baumannii* clinical isolates**

| Stock number | MIC aztreonam (µg/mL) |             | Adjuvant | MIC adjuvant (µg/mL) |             | FIC index     | Absolute MIC aztreonam (µg/mL) | Fold potentiation | Adjuvant concentration at absolute MIC (µg/mL) |
|--------------|-----------------------|-------------|----------|----------------------|-------------|---------------|--------------------------------|-------------------|------------------------------------------------|
|              | Alone                 | Combination |          | Alone                | Combination |               |                                |                   |                                                |
| AB027        | 1024                  | 512         | PMBN     | >256                 | 2           | 0.5<x<0.508   | 512                            | 2                 | 8                                              |
|              | 1024                  | 32          | GCol     | >128                 | 8           | 0.031<x<0.094 | 32                             | 32                | 8                                              |
|              | 1024                  | 8           | GPMB     | >128                 | 8           | 0.008<x<0.07  | 8                              | 128               | 8                                              |
| AB031        | 64                    | 64          | PMBN     | >256                 | 0.125       | 1<x<1.0005    | 64                             | 1                 | 0.5                                            |
|              | 64                    | 2           | GCol     | 4                    | 2           | 0.531         | 64                             | 1                 | 0.5                                            |
|              | 64                    | 32          | GPMB     | 2                    | 1           | 1             | 64                             | 1                 | 0.5                                            |
| 110193       | 128                   | 128         | PMBN     | 256                  | 0.125       | 1<x<1.0005    | 128                            | 1                 | 1                                              |
|              | 128                   | 8           | GCol     | 64                   | 4           | 0.125         | 16                             | 8                 | 1                                              |
|              | 1024                  | 512         | PMBN     | >256                 | 2           | 0.5<x<0.508   | 4                              | 32                | 1                                              |
| 92247*       | 128                   | 64          | PMBN     | 256                  | 16          | 0.5<x<0.563   | 128                            | 1                 | 8                                              |
|              | 128                   | 64          | GCol     | 128                  | 4           | 0.5<x<0.531   | 64                             | 2                 | 8                                              |
|              | 256                   | 32          | GPMB     | 128                  | 16          | 0.25          | 64                             | 4                 | 8                                              |

\*Colistin-resistant

**Table S17. Potentiation of ceftazidime and aztreonam in combination with guanidinylated polymyxins and PMBN against MDR *E. coli* 107115**

| Antibiotic  | MIC antibiotic (µg/mL) |             | Adjuvant | MIC adjuvant (µg/mL) |             | FIC index     | Absolute MIC (µg/mL) | Fold-potentiation | Adjuvant concentration at absolute MIC (µg/mL) |
|-------------|------------------------|-------------|----------|----------------------|-------------|---------------|----------------------|-------------------|------------------------------------------------|
|             | Alone                  | Combination |          | Alone                | Combination |               |                      |                   |                                                |
| Ceftazidime | 512                    | 16          | PMBN     | >256                 | 8           | 0.031<x<0.063 | 16                   | 32                | 2                                              |
|             | 512                    | 32          | GCol     | 8                    | 2           | 0.313         | 8                    | 64                | 2                                              |
|             | 512                    | 16          | GPMB     | 8                    | 1           | 0.156         | 8                    | 64                | 2                                              |
| Aztreonam   | 1024                   | 32          | PMBN     | >256                 | 8           | 0.031<x<0.063 | ND                   | ND                | 2                                              |
|             | 1024                   | 32          | GCol     | 8                    | 2           | 0.281         | 32                   | 32                | 2                                              |
|             | 1024                   | 64          | GPMB     | 8                    | 2           | 0.313         | 64                   | 16                | 2                                              |

Triple combination studies of guanidinylated polymyxins and PMBN with ceftazidime or aztreonam and avibactam against  $\beta$ -lactamase harboring *P. aeruginosa*

Table S18. Potentiation of ceftazidime in combination with guanidinylated polymyxins and PMBN against  $\beta$ -lactamase harboring *P. aeruginosa*

| Stock number | MIC ceftazidime ( $\mu\text{g/mL}$ ) |             | Adjuvant | MIC adjuvant ( $\mu\text{M}$ ) |             | FIC index | Absolute MIC ceftazidime ( $\mu\text{g/mL}$ ) | Fold potentiation | Adjuvant concentration at absolute MIC ( $\mu\text{g/mL}$ ) |
|--------------|--------------------------------------|-------------|----------|--------------------------------|-------------|-----------|-----------------------------------------------|-------------------|-------------------------------------------------------------|
|              | Alone                                | Combination |          | Alone                          | Combination |           |                                               |                   |                                                             |
| PA 107092    | 64                                   | 8           | PMBN     | 56                             | 2           | 0.161     | 8                                             | 8                 | 2                                                           |
|              | 64                                   | 16          | GCoI     | 8                              | 1           | 0.375     | 8                                             | 8                 | 2                                                           |
|              | 64                                   | 4           | GPMB     | 4                              | 1           | 0.313     | 4                                             | 16                | 1                                                           |
| PA 109084    | 64                                   | 4           | PMBN     | 56                             | 4           | 0.134     | 4                                             | 16                | 1                                                           |
|              | 128                                  | 32          | GCoI     | 8                              | 2           | 0.5       | 32                                            | 2                 | 1                                                           |
|              | 128                                  | 32          | GPMB     | 4                              | 1           | 0.5       | 16                                            | 4                 | 1                                                           |
| PA 86052     | 64                                   | 4           | PMBN     | 16                             | 1           | 0.125     | 16                                            | 4                 | 0.25                                                        |
|              | 64                                   | 32          | GCoI     | 2                              | 0.5         | 0.75      | 64                                            | 1                 | 0.25                                                        |
|              | 64                                   | 32          | GPMB     | 1                              | 0.5         | 1         | ND                                            | ND                | 0.25                                                        |
| PA 88949     | 32                                   | 4           | PMBN     | 16                             | 8           | 0.625     | 32                                            | 1                 | 0.5                                                         |
|              | 32                                   | 1           | GCoI     | 8                              | 4           | 0.531     | 32                                            | 1                 | 0.5                                                         |
|              | 32                                   | 4           | GPMB     | 4                              | 2           | 0.625     | ND                                            | ND                | 0.5                                                         |

Table S19. Potentiation of ceftazidime in combination with guanidinylated polymyxins, PMBN and 8  $\mu\text{M}$  avibactam against  $\beta$ -lactamase harboring *P. aeruginosa*

| Stock number | MIC ceftazidime ( $\mu\text{g/mL}$ ) |             | Adjuvant | MIC adjuvant ( $\mu\text{M}$ ) |             | FIC index | Absolute MIC ceftazidime ( $\mu\text{g/mL}$ ) | Fold potentiation | Adjuvant concentration at absolute MIC ( $\mu\text{g/mL}$ ) |
|--------------|--------------------------------------|-------------|----------|--------------------------------|-------------|-----------|-----------------------------------------------|-------------------|-------------------------------------------------------------|
|              | Alone                                | Combination |          | Alone                          | Combination |           |                                               |                   |                                                             |
| PA 107092    | 16                                   | 0.5         | PMBN     | 56                             | 8           | 0.174     | 2                                             | 8                 | 2                                                           |
|              | 8                                    | 1           | GCoI     | 8                              | 1           | 0.25      | 0.5                                           | 16                | 2                                                           |
|              | 8                                    | 0.5         | GPMB     | 4                              | 1           | 0.313     | 0.5                                           | 16                | 1                                                           |
| PA 109084    | 16                                   | 1           | PMBN     | 56                             | 4           | 0.134     | 4                                             | 4                 | 2                                                           |
|              | 16                                   | 4           | GCoI     | 8                              | 2           | 0.5       | 4                                             | 4                 | 2                                                           |
|              | 16                                   | 0.5         | GPMB     | 8                              | 2           | 0.281     | 0.5                                           | 32                | 2                                                           |

**Table S20. Potentiation of aztreonam in combination with guanidinylated polymyxins and PMBN against  $\beta$ -lactamase harboring *P. aeruginosa***

| Stock number | MIC aztreonam ( $\mu\text{g/mL}$ ) |             | Adjuvant | MIC adjuvant ( $\mu\text{M}$ ) |             | FIC index | Absolute MIC aztreonam ( $\mu\text{g/mL}$ ) | Fold potentiation | Adjuvant concentration at absolute MIC ( $\mu\text{g/mL}$ ) |
|--------------|------------------------------------|-------------|----------|--------------------------------|-------------|-----------|---------------------------------------------|-------------------|-------------------------------------------------------------|
|              | Alone                              | Combination |          | Alone                          | Combination |           |                                             |                   |                                                             |
| PA 107092    | 32                                 | 2           | PMBN     | 56                             | 8           | 0.206     | 8                                           | 4                 | 2                                                           |
|              | 32                                 | 8           | GCoI     | 8                              | 1           | 0.375     | 8                                           | 4                 | 2                                                           |
|              | 64                                 | 4           | GPMB     | 4                              | 1           | 0.313     | 4                                           | 16                | 2                                                           |
| PA 109084    | 64                                 | 4           | PMBN     | 56                             | 0.5         | 0.071     | 4                                           | 16                | 1                                                           |
|              | 64                                 | 4           | GCoI     | 4                              | 2           | 0.563     | 32                                          | 2                 | 1                                                           |
|              | 64                                 | 16          | GPMB     | 2                              | 0.5         | 0.5       | 16                                          | 4                 | 0.5                                                         |
| PA 86052     | 64                                 | 8           | PMBN     | 16                             | 0.5         | 0.156     | 16                                          | 4                 | 0.25                                                        |
|              | 32                                 | 16          | GCoI     | 2                              | 0.25        | 0.625     | 16                                          | 2                 | 0.25                                                        |
|              | 32                                 | 16          | GPMB     | 1                              | 0.125       | 0.625     | 16                                          | 2                 | 0.25                                                        |
| PA 88949     | 16                                 | 4           | PMBN     | 16                             | 8           | 0.75      | 16                                          | 1                 | 0.5                                                         |
|              | 16                                 | 2           | GCoI     | 8                              | 4           | 0.625     | 16                                          | 1                 | 0.5                                                         |
|              | 16                                 | 2           | GPMB     | 4                              | 2           | 0.625     | 16                                          | 1                 | 0.5                                                         |

**Table S21. Potentiation of aztreonam in combination with guanidinylated polymyxins, PMBN and 8  $\mu\text{M}$  avibactam against  $\beta$ -lactamase harboring *P. aeruginosa***

| Stock number | MIC aztreonam ( $\mu\text{g/mL}$ ) |             | Adjuvant | MIC adjuvant ( $\mu\text{M}$ ) |             | FIC index | Absolute MIC aztreonam ( $\mu\text{g/mL}$ ) | Fold potentiation | Adjuvant concentration at absolute MIC ( $\mu\text{g/mL}$ ) |
|--------------|------------------------------------|-------------|----------|--------------------------------|-------------|-----------|---------------------------------------------|-------------------|-------------------------------------------------------------|
|              | Alone                              | Combination |          | Alone                          | Combination |           |                                             |                   |                                                             |
| PA 107092    | 16                                 | 2           | PMBN     | 56                             | 8           | 0.268     | 4                                           | 4                 | 2                                                           |
|              | 8                                  | 1           | GCoI     | 8                              | 1           | 0.25      | 1                                           | 8                 | 2                                                           |
|              | 16                                 | 1           | GPMB     | 8                              | 1           | 0.188     | 1                                           | 16                | 1                                                           |
| PA 109084    | 8                                  | 0.5         | PMBN     | 56                             | 2           | 0.098     | 0.5                                         | 16                | 2                                                           |
|              | 8                                  | 4           | GCoI     | 4                              | 1           | 0.75      | 4                                           | 2                 | 0.5                                                         |
|              | 8                                  | 4           | GPMB     | 2                              | 0.5         | 0.75      | 4                                           | 2                 | 0.5                                                         |



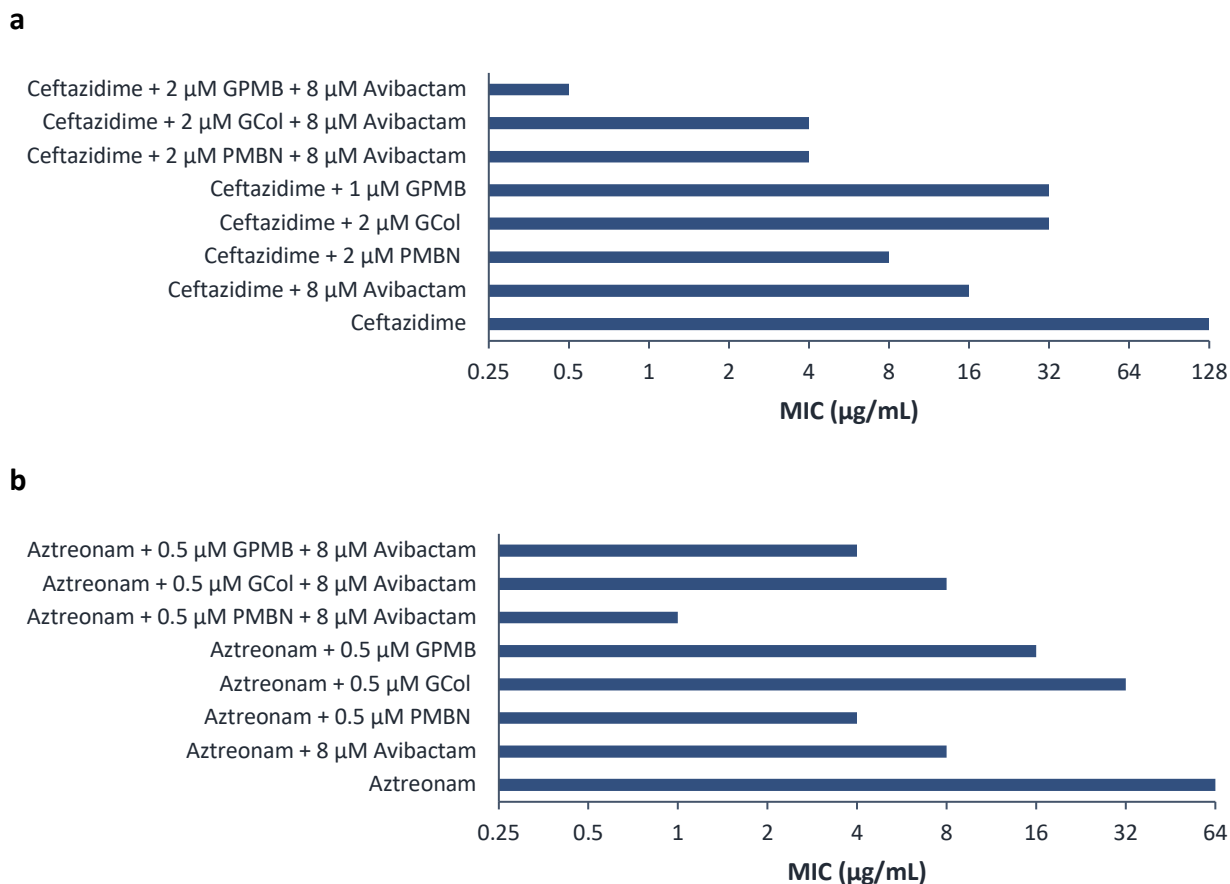

**Figure S1.** Triple combination of **(a)** ceftazidime and **(b)** aztreonam with avibactam and guanidinylated polymyxins or PMBN against *P. aeruginosa* PA 109084.

### Time-kill curves

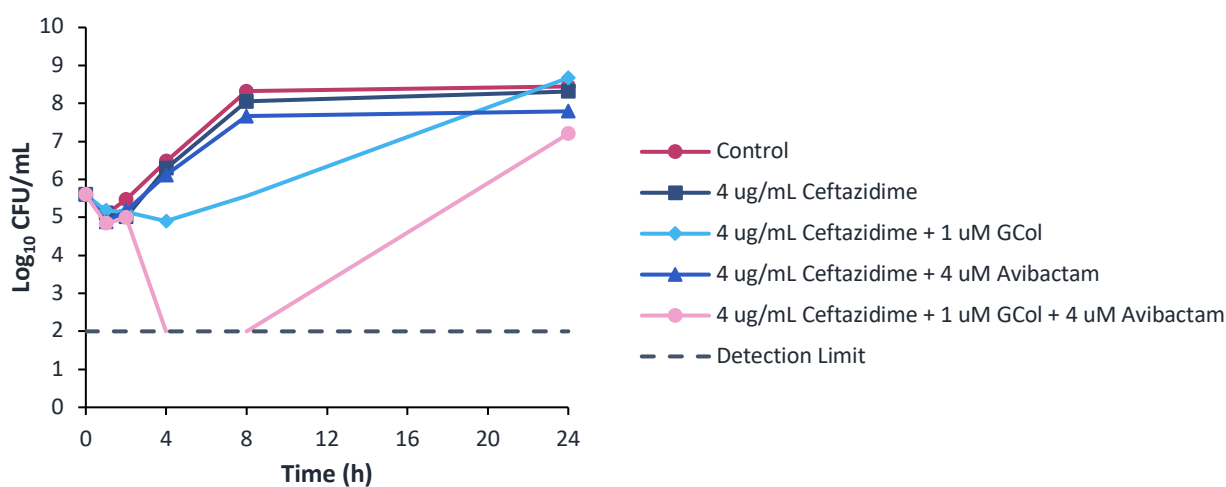

**Figure S2.** Time-kill curves of ceftazidime monotherapy, dual and triple combination with GCol and avibactam against *P. aeruginosa* PA 107092.

## Outer membrane permeabilization

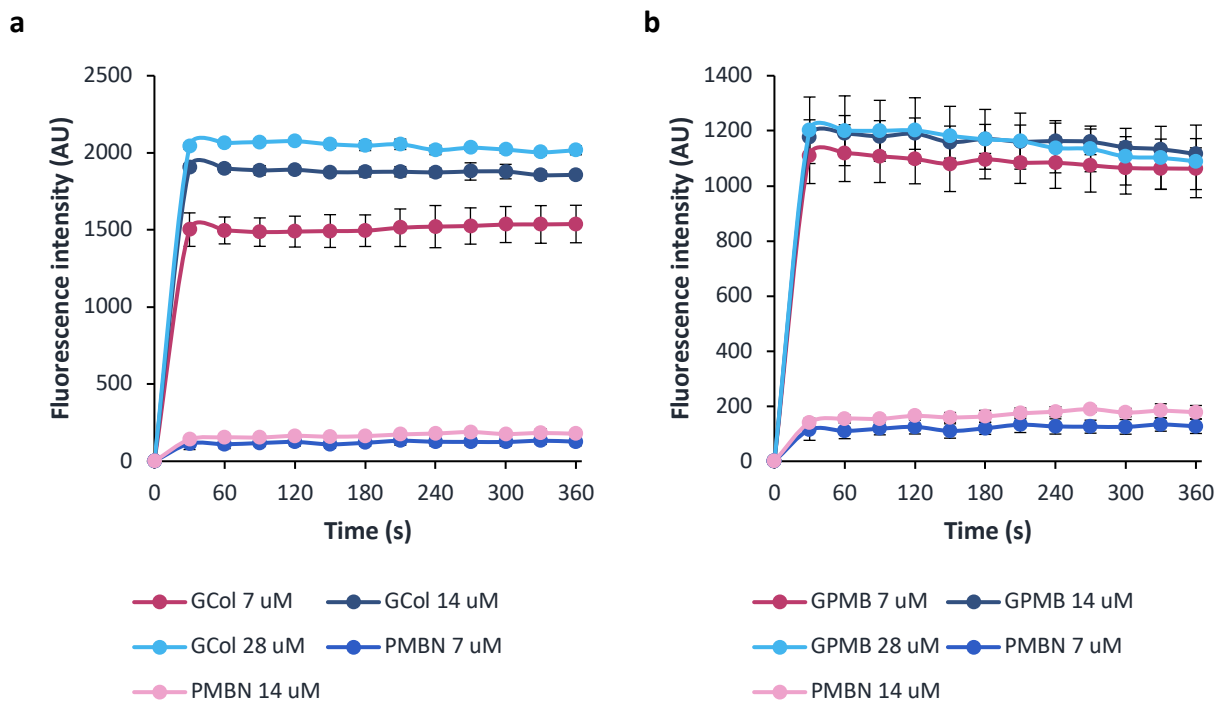

**Figure S3.** Measurement of OM permeabilization via NPN uptake induced by (a) GCol and (b) GPMB with PMBN as control against wild-type *P. aeruginosa* PAO1 cells.

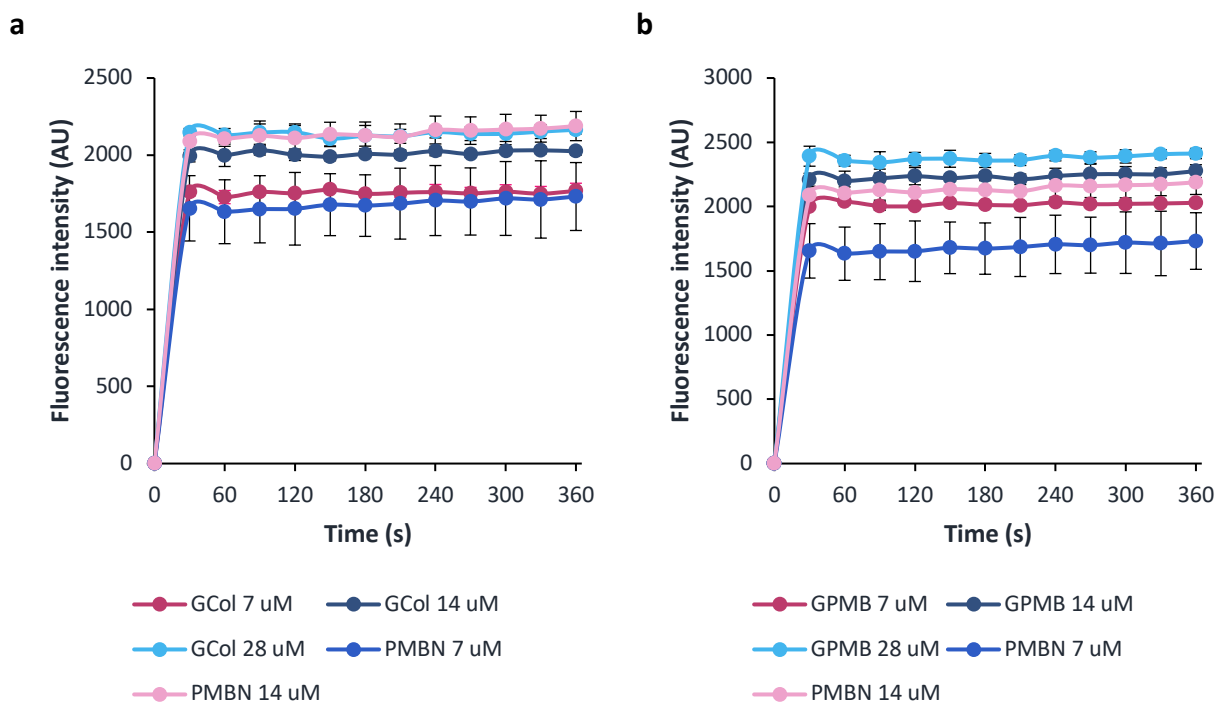

**Figure S4.** Measurement of OM permeabilization via NPN uptake induced by (a) GCol and (b) GPMB with PMBN as control against wild-type *A. baumannii* ATCC 17978 cells.

## Structure of guanidinylated polymyxins

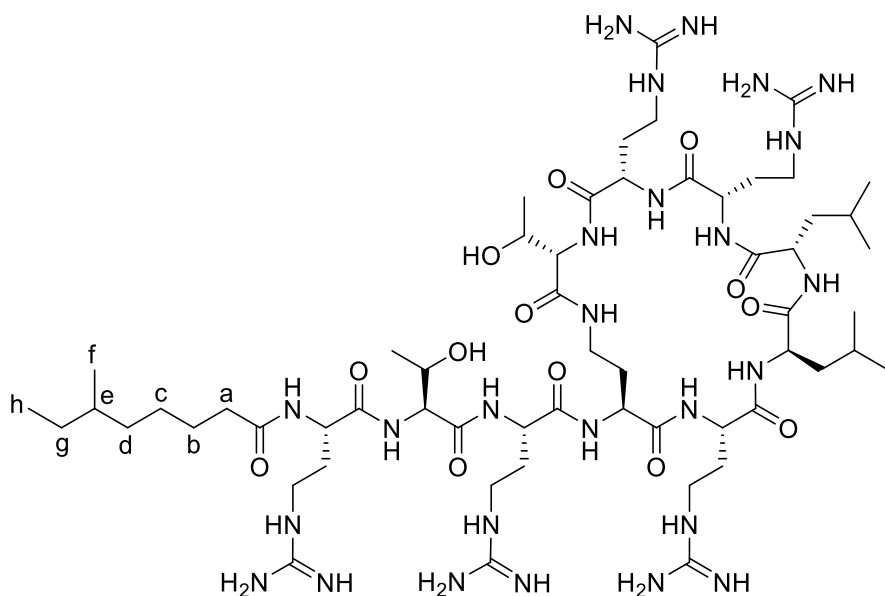

## Structure of GCol A

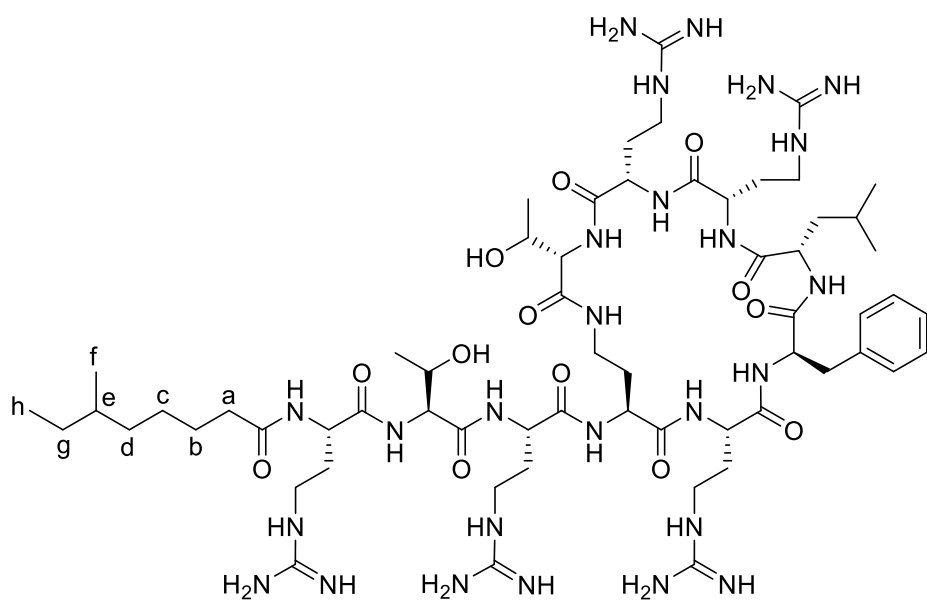

## Structure of GPMB<sub>1</sub>

## NMR spectra of guanidinylated polymyxins

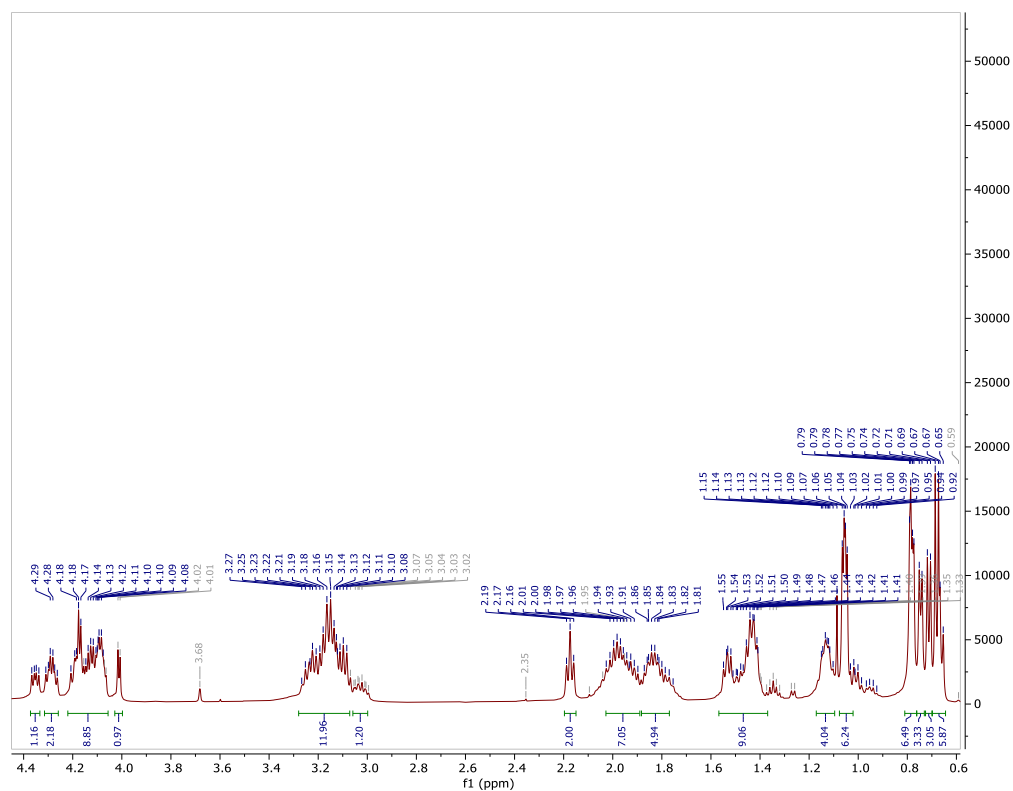

Figure S5. <sup>1</sup>H NMR spectrum of GCol.

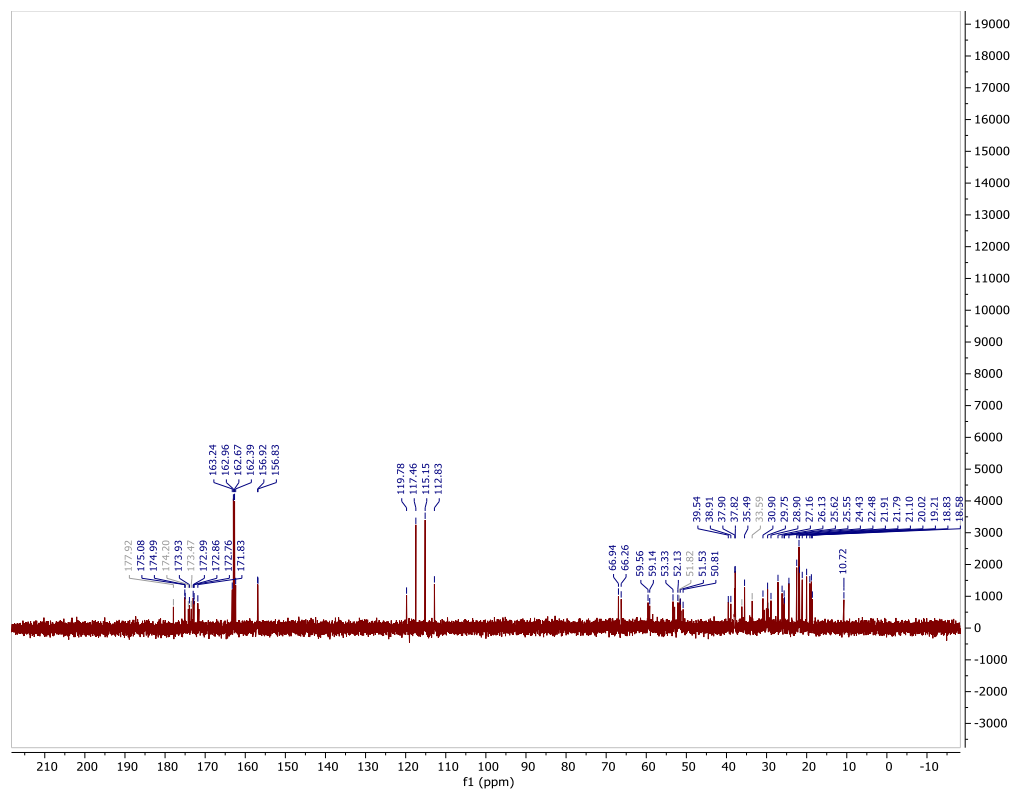

Figure S6. <sup>13</sup>C NMR spectrum of GCol.

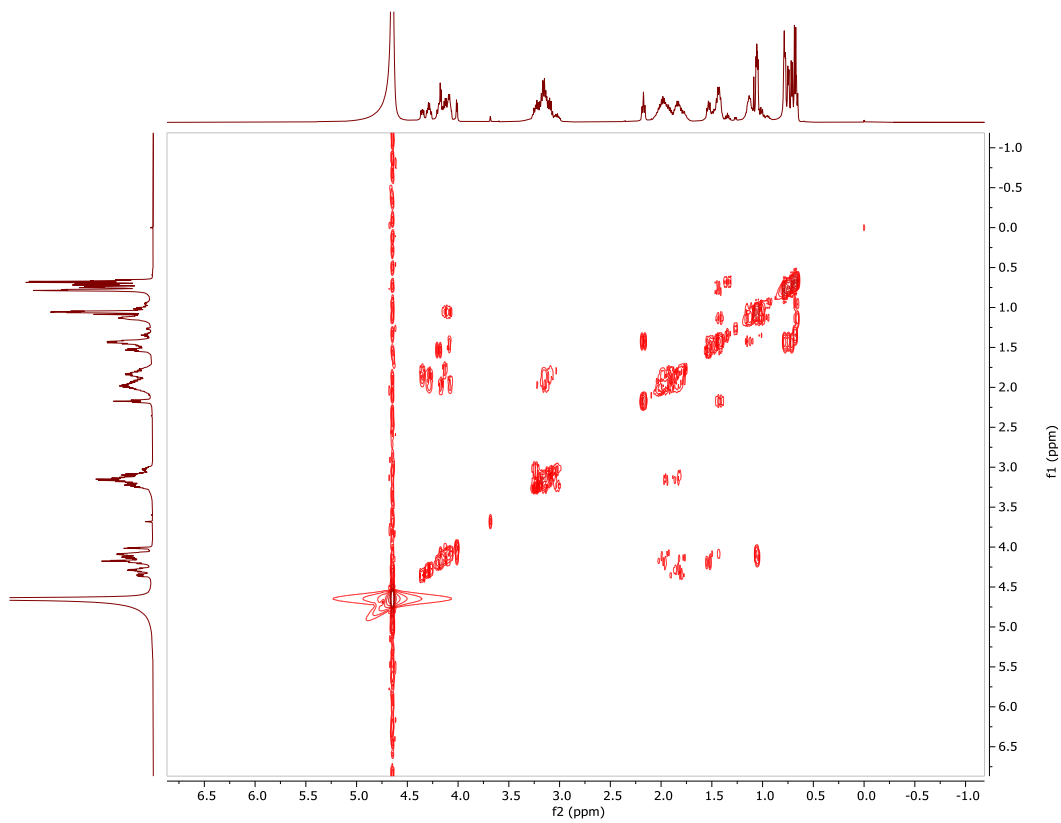

**Figure S7.** COSY NMR spectrum of GCol.

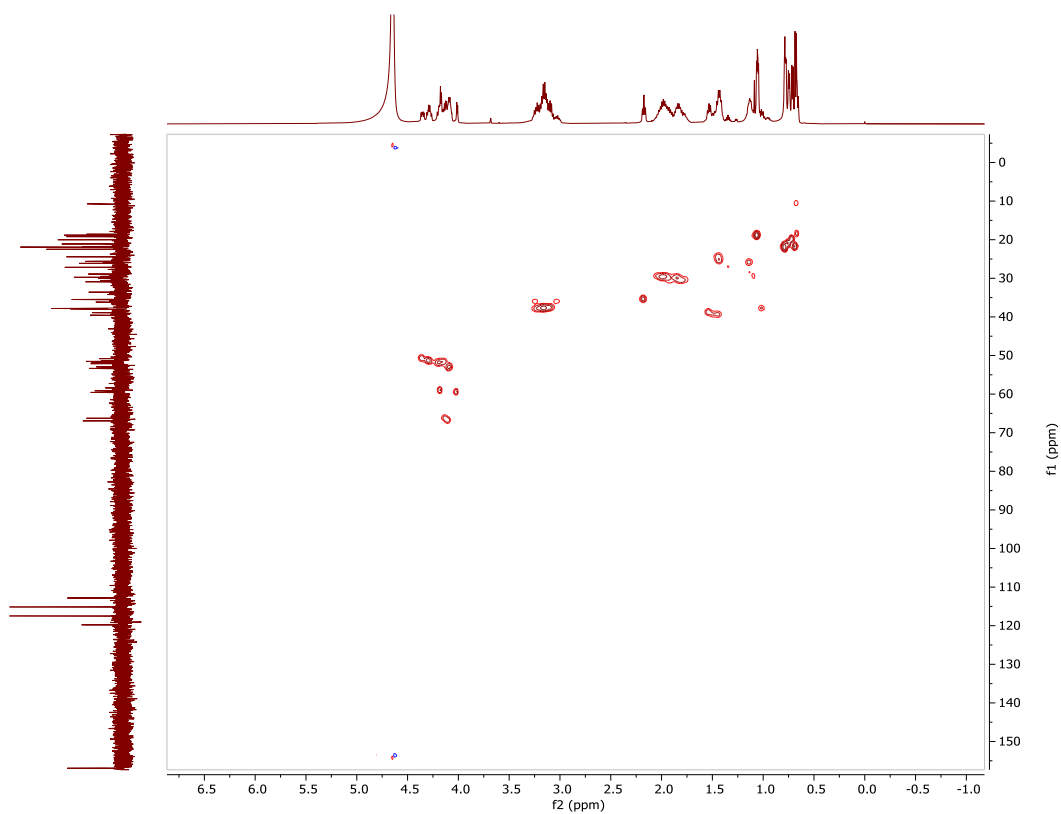

**Figure S8.** HSQC NMR spectrum of GCol.

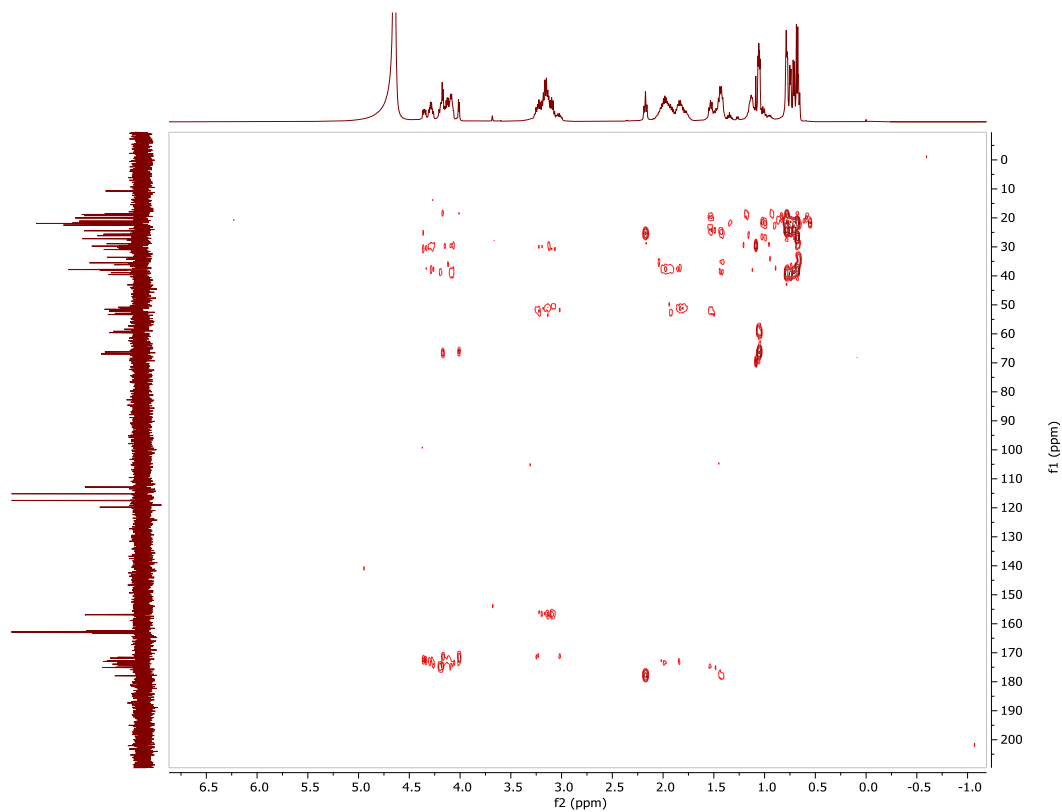

**Figure S9.** HMBC NMR spectrum of GCol.

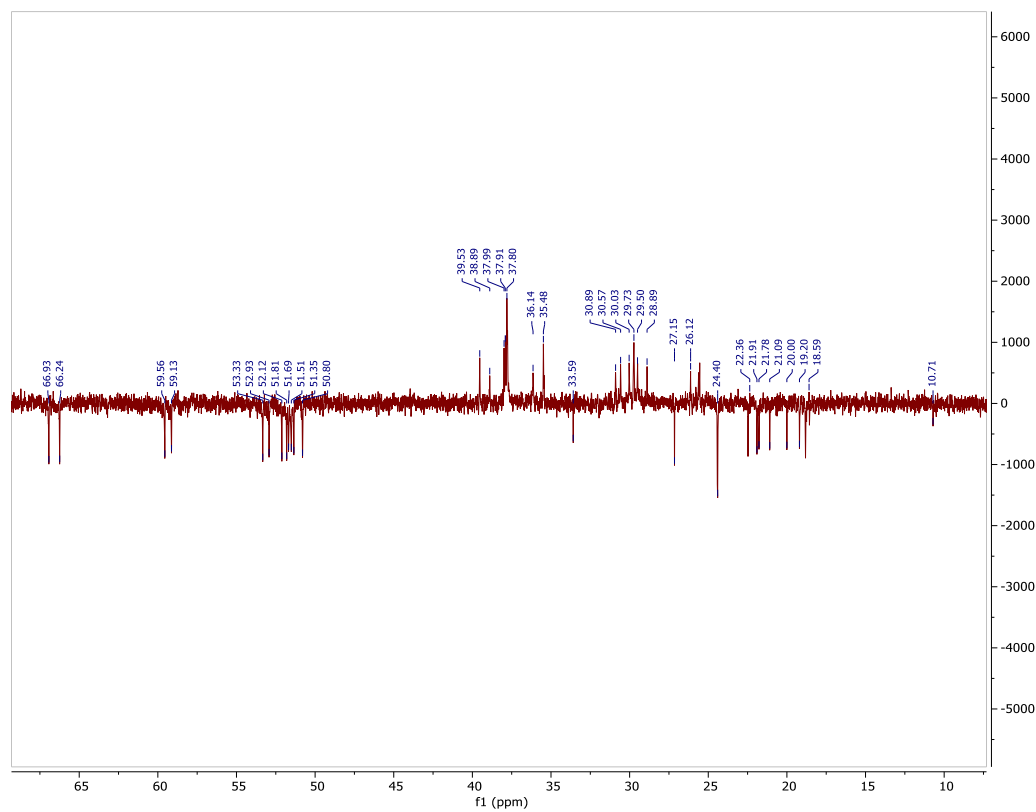

**Figure S10.**  $^{13}\text{C}$  DEPT 135 NMR spectrum of GCol.

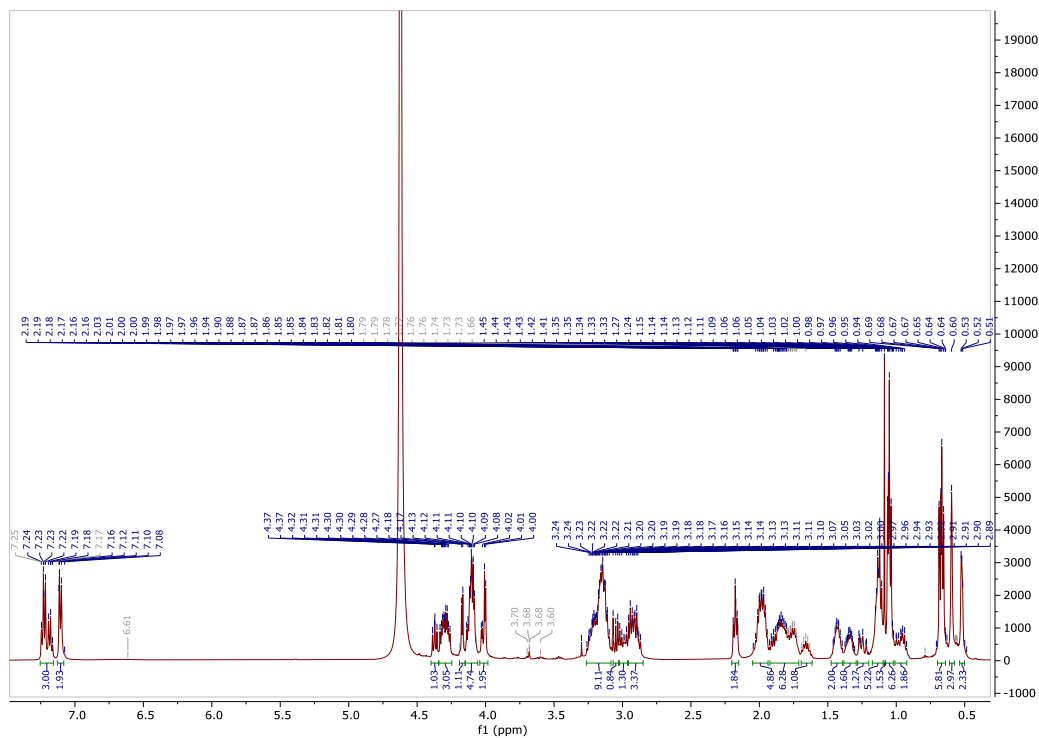

Figure S11. <sup>1</sup>H NMR spectrum of GPMB.

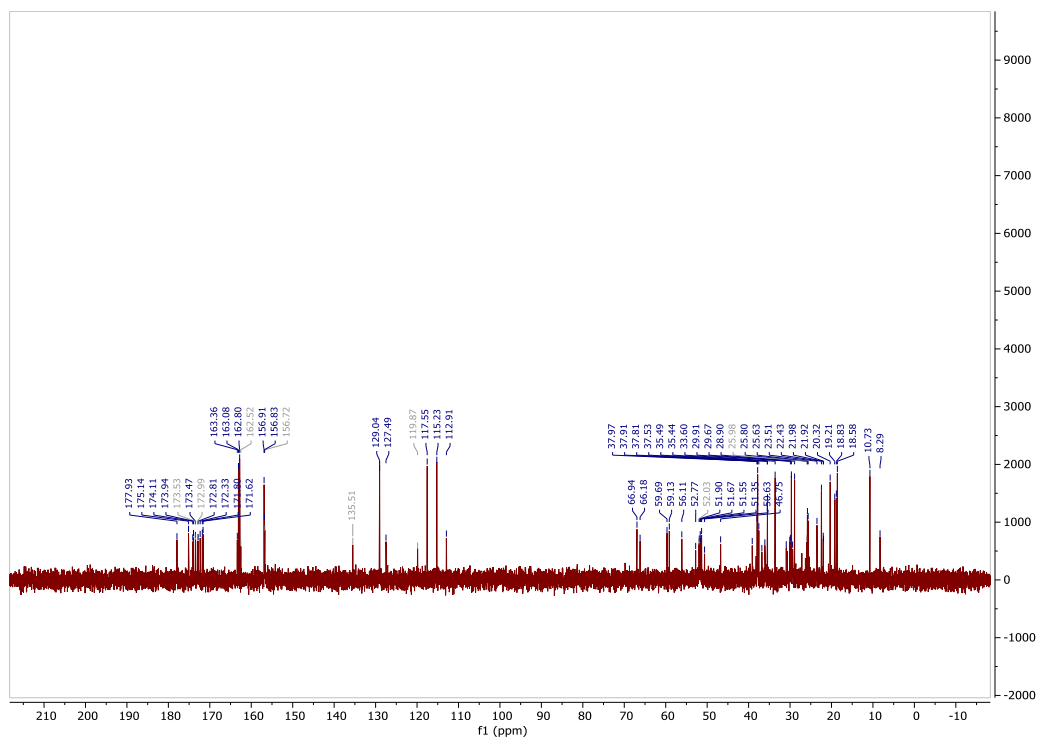

Figure S12. <sup>13</sup>C NMR spectrum of GPMB.

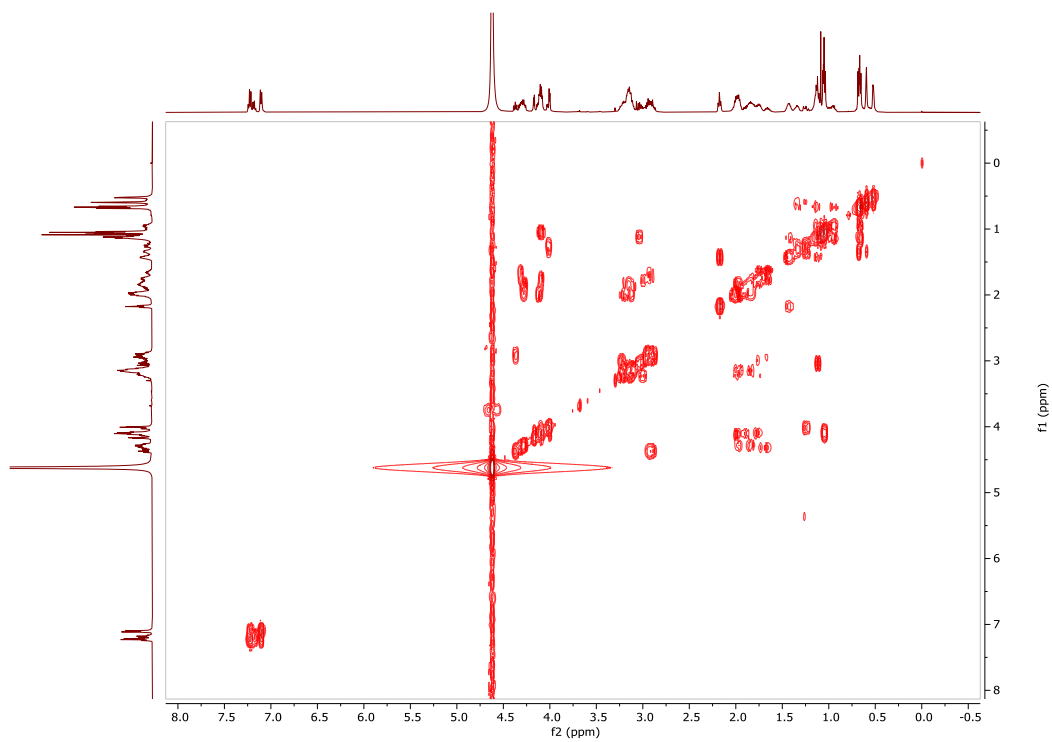

**Figure S13.** COSY NMR spectrum of GPMB.

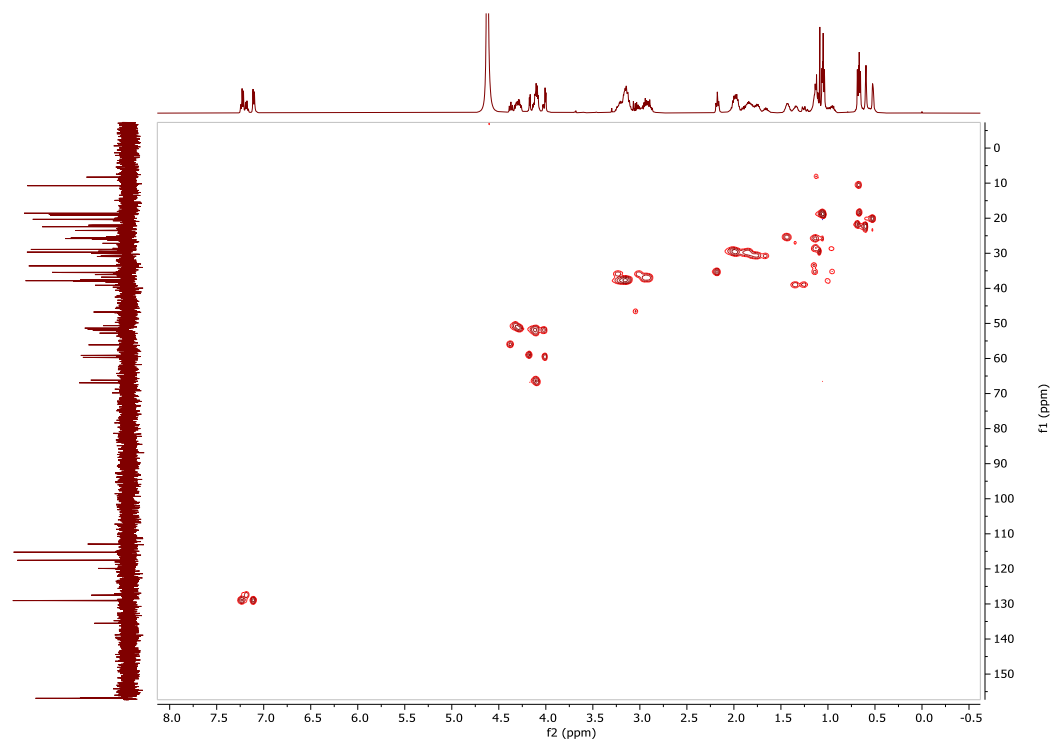

**Figure S14.** HSQC NMR spectrum of GPMB.



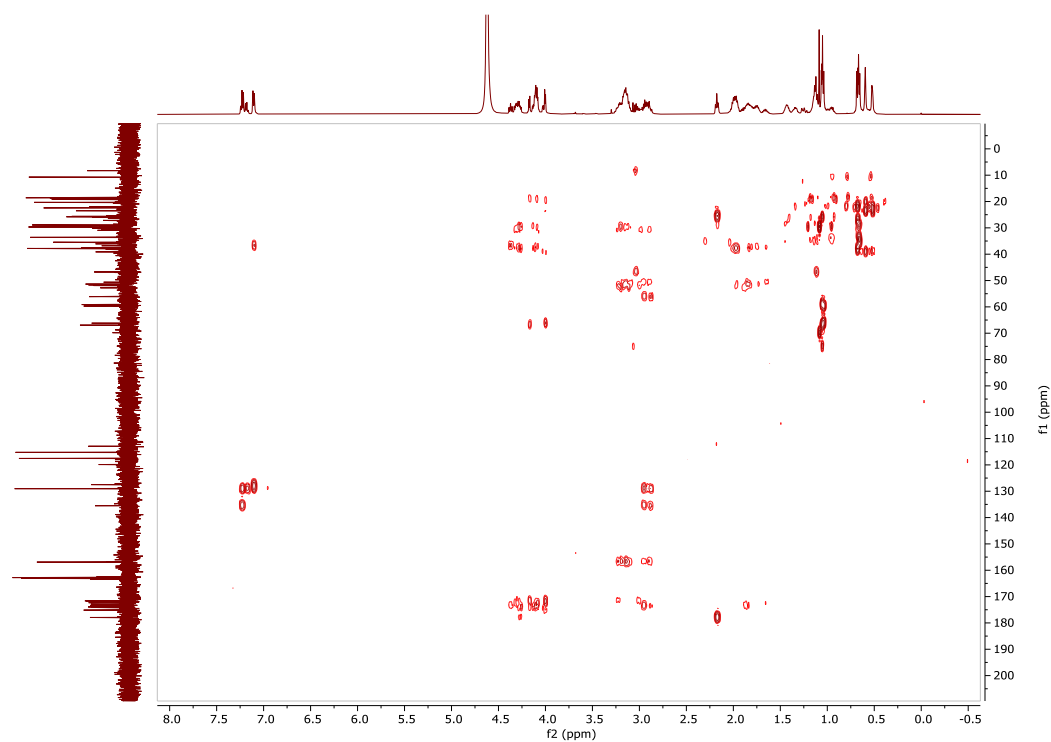

Figure S15. HMBC NMR spectrum of GPMB.

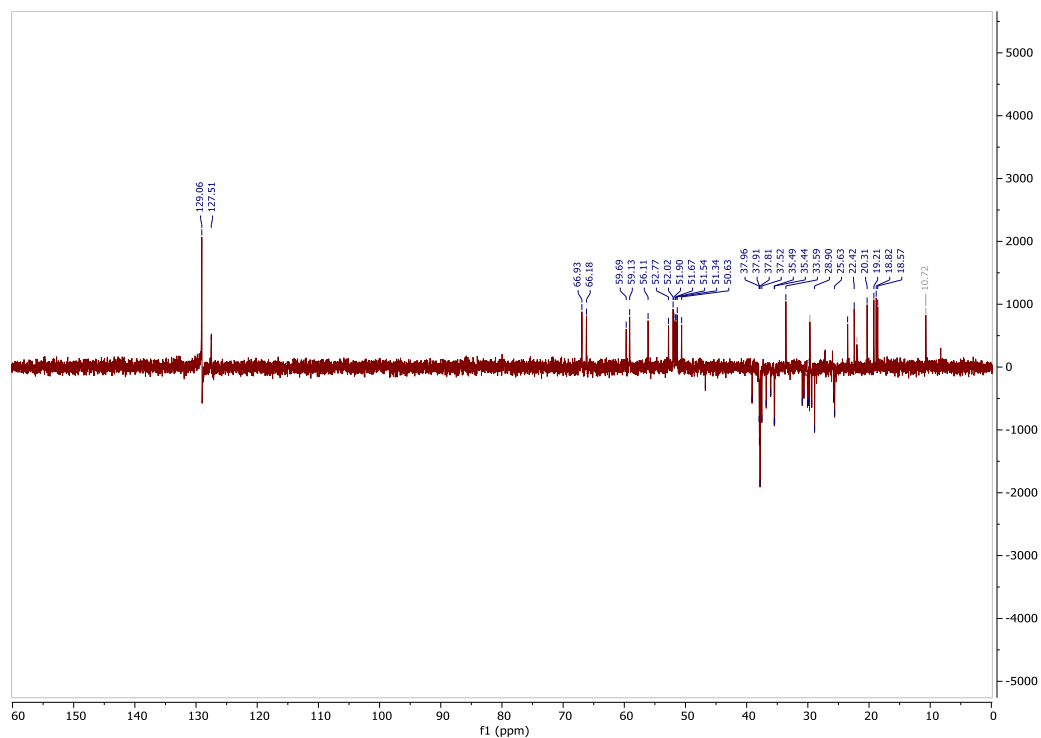

Figure S16.  $^{13}\text{C}$  DEPT 135 NMR spectrum of GPMB.

## MALDI-MS spectra

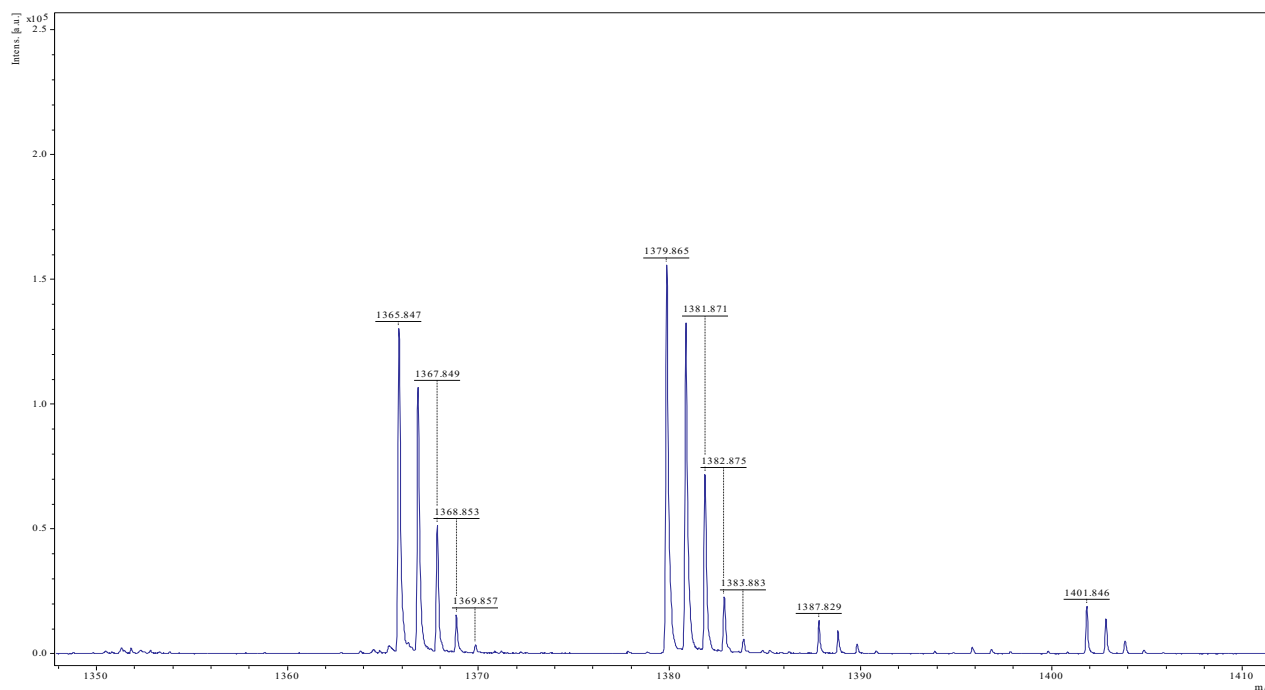

**Figure S17.** Mass spectrum of GCol. 1379.87  $m/z$  and 1365.85  $m/z$  correspond to  $[M+H]$  of GCol A and B, respectively. 1401.85  $m/z$  and 1387.83  $m/z$  correspond to  $[M+Na]$  of GCol A and B, respectively.

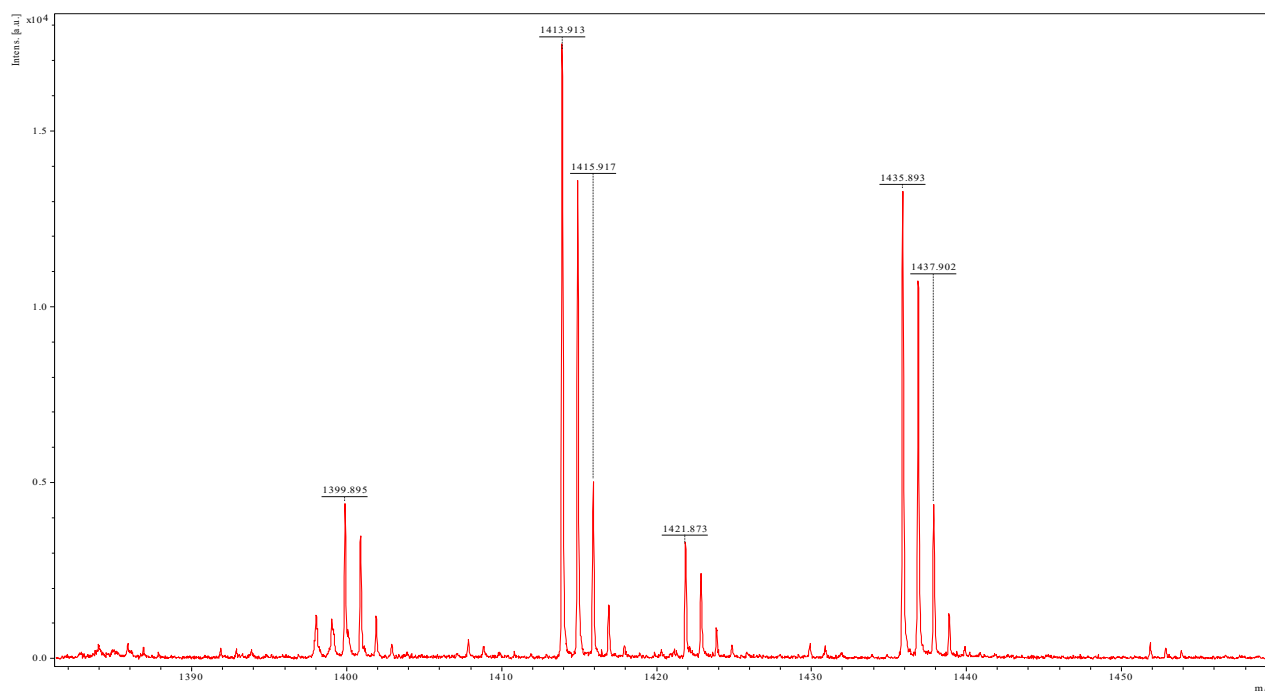

**Figure S18.** Mass spectrum of GPMB. 1413.87  $m/z$  and 1399.85  $m/z$  correspond to  $[M+H]$  of GPMB<sub>1</sub> and B<sub>2</sub>, respectively. 1435.89  $m/z$  and 1421.87  $m/z$  correspond to  $[M+Na]$  of GPMB<sub>1</sub> and B<sub>2</sub>, respectively.

## HPLC chromatograms

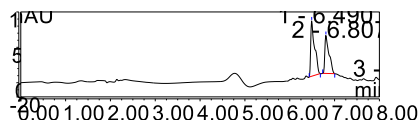

| Peak number | Compound | Retention time (min) | Relative area (%) | Area (mAU*min) | Height (mAU) |
|-------------|----------|----------------------|-------------------|----------------|--------------|
| 1           | GCol B   | 6.490                | 57.60             | 7.8285         | 78.19        |
| 2           | GCol A   | 6.807                | 42.40             | 5.7625         | 53.63        |

**Figure S19.** HPLC chromatogram of GCol.

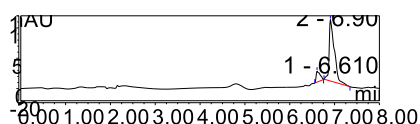

| Peak number | Compound          | Retention time (min) | Relative area (%) | Area (mAU*min) | Height (mAU) |
|-------------|-------------------|----------------------|-------------------|----------------|--------------|
| 1           | GPMB <sub>2</sub> | 6.610                | 11.58             | 1.7836         | 18.12        |
| 2           | GPMB <sub>1</sub> | 6.907                | 88.42             | 13.6156        | 101.21       |

**Figure S20.** Chromatogram of GPMB.

Eluted with 100% solvent A (20% acetonitrile with 0.1% TFA) for 5 minutes, then eluted with a linear gradient to 100% solvent B (50% acetonitrile and 20% methanol with 0.1% TFA) for 5 minutes with a flow rate of 0.5 mL/min on a reverse-phase C18 column. Detection wavelength was 210 nm.

## Resistance phenotype of MDR/XDR clinical isolates

**Table S22.** Susceptibility profiles of MDR/XDR *P. aeruginosa* isolates

| Stock number | PTZ | A/C | FOX | CFZ  | CTR | CPM | CTX  | IMI | MER  | DOR   | ETP | CIP | LEV | MOX | TOB  | GEN | AMK | TGC | MIN | DOX  | ERC | OMC | CAM  |
|--------------|-----|-----|-----|------|-----|-----|------|-----|------|-------|-----|-----|-----|-----|------|-----|-----|-----|-----|------|-----|-----|------|
| P259-96918   | 64  | >32 | >32 | >128 | >64 | >64 | 2048 | 32  | 1024 | >1024 | >32 | >16 | 256 | >16 | 256  | >32 | >64 | 32  | 32  | 32   | 8   | 64  | 1024 |
| P262-101856  | 64  | >32 | >32 | >128 | 64  | 32  | 128  | 32  | 32   | 16    | >32 | >16 | 64  | >16 | 1024 | >32 | >64 | 32  | 64  | 1024 | 8   | 64  | 2048 |
| P264-104354  | 256 | >32 | >32 | >128 | >64 | 32  | 2048 | 32  | 64   | 16    | >32 | >16 | 64  | >16 | 128  | >32 | 8   | 32  | 32  | 64   | 8   | 64  | 4096 |
| 114228       | ND  | ND  | ND  | ND   | ND  | ND  | 128  | ND  | 8    | 8     | ND  | ND  | ND  | ND  | 2    | ND  | ND  | ND  | 32  | 16   | 16  | 128 | ND   |
| 101243       | 128 | >32 | >32 | >128 | >64 | 64  | ND   | 16  | 16   | 16    | >32 | 1   | ND  | 8   | 128  | >32 | >64 | ND  | 2   | 4    | ND  | ND  | 1    |

**Table S23.** Susceptibility profiles of MDR/XDR *A. baumannii* isolates

| Stock number | PTZ | FOX | CFZ  | CPM  | CTX  | C/T | IMI  | MER | CIP    | LEV  | MOX   | TOB | GEN  | AMK | TGC  | MIN   | DOX | ERC   | OMC | CAM |
|--------------|-----|-----|------|------|------|-----|------|-----|--------|------|-------|-----|------|-----|------|-------|-----|-------|-----|-----|
| AB027        | 512 | ND  | >128 | >128 | >256 | >16 | 32   | 16  | >16    | 8    | 8     | ND  | 32   | >64 | 4    | 0.25  | ND  | 0.5   | 1   | 128 |
| AB031        | 4   | ND  | >128 | 4    | 16   | >16 | 0.25 | 1   | 0.25   | 0.25 | 0.125 | ND  | <0.5 | 2   | 8    | 0.25  | ND  | 0.25  | 2   | 128 |
| 110193       | ND  | ND  | ND   | ND   | ND   | ND  | ND   | ND  | ≤1     | ≤1   | ≤1    | ND  | ND   | ND  | ND   | 1     | ND  | ND    | ND  | 128 |
| 92247        | <1  | 32  | 128  | 4    | ND   | 2   | ND   | 4   | ≤0.063 | ND   | ND    | ND  | ND   | <1  | 0.25 | 0.125 | ND  | ND    | ND  | ND  |
| LAC-4        | ND  | ND  | ND   | ND   | 1    | 8   | <1   | <1  | >4     | 2    | ND    | >4  | >4   | 4   | <4   | 4     | <4  | 0.063 | 1   | 32  |

**Table S24.** Susceptibility profiles of MDR/XDR *E. coli* isolates

| Stock number | PTZ  | A/C | AZT   | FOX | CFZ  | CPM   | CAZ   | C/T  | IMI  | MER   | ETP   | CIP | LEV | MOX | TOB  | GEN  | AMK | TGC  | MIN | DOX | ERC   | OMC | CAM |
|--------------|------|-----|-------|-----|------|-------|-------|------|------|-------|-------|-----|-----|-----|------|------|-----|------|-----|-----|-------|-----|-----|
| 94393        | ≤1   | 4   | ≤0.13 | 4   | 1    | ≤0.25 | ≤0.25 | 0.25 | 0.25 | ≤0.03 | ≤0.03 | 0.5 | 1   | 1   | ≤0.5 | ≤0.5 | 2   | 0.25 | 2   | 4   | 0.5   | 4   | 4   |
| 94474        | 16   | >32 | ≤0.13 | 16  | 4    | ≤0.25 | 0.5   | 0.5  | 0.25 | ≤0.03 | ≤0.03 | >16 | 32  | 16  | 32   | 16   | 2   | 1    | 64  | 32  | 1     | 16  | 4   |
| 107115       | >512 | >32 | >64   | >32 | >128 | >64   | >32   | >16  | 8    | 32    | >32   | >16 | 32  | 16  | 8    | >32  | 2   | 0.25 | 32  | >32 | 0.125 | 4   | 512 |

**Table S25.** Susceptibility profiles of MDR/XDR *E. cloacae* isolates

| Stock number | PTZ | A/C | AZT   | FOX | CFZ  | CAZ | CPM  | MER  | CIP  | MOX  | TOB | GEN | AMK | DOX |
|--------------|-----|-----|-------|-----|------|-----|------|------|------|------|-----|-----|-----|-----|
| 118564       | 2   | >32 | ≤0.13 | >32 | >128 | 0.5 | 0.25 | 0.13 | 0.06 | 0.13 | 1   | 1   | 2   | 4   |
| 121187       | 1   | 8   | ≤0.13 | >32 | 32   | 0.5 | 0.25 | 0.06 | 0.25 | 1    | 32  | >32 | 1   | >32 |

**Table S26.** Susceptibility profiles of MDR/XDR *K. pneumoniae* isolates

| Stock number | PTZ | A/C | AZT   | FOX | CFZ | CPM | CAZ   | C/T | IMI  | MER   | ETP   | CIP   | LEV   | MOX   | TOB  | GEN   | AMK | MIN | DOX | ERC | OMC | CAM |
|--------------|-----|-----|-------|-----|-----|-----|-------|-----|------|-------|-------|-------|-------|-------|------|-------|-----|-----|-----|-----|-----|-----|
| 113250       | 4   | 4   | ≤0.13 | 1   | 1   | 1   | 0.5   | 2   | 0.25 | ≤0.03 | ≤0.03 | ≤0.06 | 0.13  | ≤0.06 | ≤0.5 | ≤0.5  | ≤1  | 2   | 2   | 1   | 2   | 4   |
| 113254       | <1  | 2   | ≤0.13 | 1   | 1   | 1   | ≤0.25 | 0.5 | 0.13 | ≤0.03 | ≤0.03 | ≤0.06 | ≤0.06 | ≤0.06 | ≤0.5 | ≤0.51 | ≤   | 2   | 128 | 0.5 | 4   | 2   |

**Table S27.** Susceptibility profiles of  $\beta$ -lactamase-harboring MDR *P. aeruginosa* isolates

| Stock number | PTZ | A/C | AZT | FOX | CFZ  | CTR | CPM | CTP | C/T | CAZ | CAZ-AVI | IMI | MER | ETP | CIP | MOX | TOB | GEN | AMK | DOX | SXT | NFN  |
|--------------|-----|-----|-----|-----|------|-----|-----|-----|-----|-----|---------|-----|-----|-----|-----|-----|-----|-----|-----|-----|-----|------|
| PA 86052     | 256 | >32 | 64  | >32 | >128 | >64 | 32  | 16  | 2   | 64  | 4       | 32  | 16  | >32 | >16 | >16 | 1   | 4   | 16  | >32 | >8  | >512 |
| PA 88949     | 256 | >32 | 32  | >32 | >128 | >64 | 32  | 32  | 2   | 64  | 4       | >32 | 16  | 32  | 4   | 8   | 4   | 16  | 32  | >32 | >8  | >512 |
| PA 107092    | 512 | >32 | 64  | >32 | >128 | >64 | 64  | 32  | 2   | 128 | 16      | 32  | 32  | >32 | >16 | >16 | >64 | >32 | 8   | >32 | >8  | >512 |
| PA 108590    | 256 | >32 | 32  | >32 | >128 | >64 | 32  | 16  | 2   | 32  | 2       | 32  | 16  | >32 | 4   | 16  | 4   | 16  | 32  | >32 | >8  | >512 |
| PA 109084    | 512 | >32 | 64  | >32 | >128 | >64 | 32  | 16  | 2   | 64  | 4       | 32  | 16  | >32 | 4   | 16  | 4   | 16  | 32  | 16  | 4   | >512 |

PTZ: piperacillin-tazobactam, A/C: amoxicillin-clavulanic acid, AZT: aztreonam, FOX: ceftiofloxacin, CFZ: cefazolin, CTP: ceftobiprole, CTR: ceftriaxone, CPM: cefepime, CTX: cefotaxime, CAZ: ceftazidime, C/T: ceftolozane-tazobactam, IMI: imipenem, MER: meropenem, DOR: doripenem, ETP: ertapenem, CIP: ciprofloxacin, LEV: levofloxacin, MOX: moxifloxacin, TOB: tobramycin, GEN: gentamicin, AMK: amikacin, TGC: tigecycline, MIN: minocycline, DOX: doxycycline, ERC: eravacycline, OMC: omadacycline, CAM: chloramphenicol, CAZ-AVI: ceftazidime-avibactam, SXT: sulfamethoxazole-trimethoprim, NFN: nitrofurantoin, ND: not determined
